# Supplementary material for: Interfacial improvements in biocomposites based on poly(3-hydroxybutyrate) and poly(3-hydroxybutyrate-co-3-hydroxyvalerate) bioplastics reinforced and grafted with α-cellulose fibers
Source: Royal Society of Chemistry journal article supplement (doi:10.1039/c5gc01568e), 2015-01-01
Supplement: c5gc01568e1.pdf [file c5gc01568e1.pdf]

1 **Interfacial improvements in biocomposites based on poly(3-hydroxybutyrate) and poly(3-**  
2 **hydroxybutyrate-co-3-hydroxyvalerate) bioplastics reinforced and grafted with  $\alpha$ -cellulose**  
3 **fibers**

4 Liqing Wei <sup>a</sup>, Nicole M. Stark <sup>b</sup>, and Armando G. McDonald <sup>a,\*</sup>

5 <sup>a</sup> Renewable Materials Program, Department of Forest, Rangeland and Fire Sciences, University  
6 of Idaho, Moscow, Idaho 83844-1132, United States

7 <sup>b</sup> U.S. Department of Agriculture, Forest Service, Forest Products Laboratory, One Gifford  
8 Pinchot Drive, Madison, Wisconsin 53726-2398, United States

9 \* Corresponding author. Tel.: +1 (208) 885 9454; Fax: +1 (208) 885 6226; E-mail address:

10 armandm@uidaho.edu

11

12 **Table of contents**

13

14 This in-situ grafting modification offers an effective approach to improve the properties of  
15 biocomposite materials from sustainable resources.

## 16 **Abstract**

17       In this study,  $\alpha$ -cellulose fibers reinforced green biocomposites based on  
18 polyhydroxybutyrate (PHB) and the copolymer poly(3-hydroxybutyrate-*co*-3-hydroxyvalerate)  
19 (PHBV) were prepared and characterized. The  $\alpha$ -cellulose fibers were isolated from at-risk  
20 intermountain lodgepole pine wood by successive removing of extractives, lignin and  
21 hemicellulose. Grafting of PHB or PHBV onto cellulose was conducted using reactive extrusion  
22 with dicumyl peroxide free radical initiation at high temperature. It is postulated that the grafted  
23 copolymers at the interfaces of cellulose and polymer matrix performed as interfacial coupling  
24 agent. Grafting tended to interact with both the hydrophilic fibers and hydrophobic PHB or  
25 PHBV matrix. The biocomposites were characterized by scanning electron microscopy (SEM)  
26 and dynamic mechanical analysis (DMA) and indicated good interfacial bonding and  
27 compatibility between the two phases. The mechanical properties of the biocomposites were  
28 improved by grafting due to improved stress transfer between the two interphases of  
29 fiber/polymer matrix as compared to the blend control composite. The crystallinity of PHB,  
30 PHBV and cellulose in the biocomposite were reduced as determined by Fourier transform  
31 infrared spectroscopy (FTIR), wide-angle X-ray diffraction (WAXD), and differential scanning  
32 calorimetry (DSC) analyses. This *in-situ* reactive extrusion process offers an effective approach  
33 to improve the properties of biocomposite materials from sustainable resources.

34

## 35 **1. Introduction**

36       Strong, lightweight, and moldable plastics are used in thousands of products that improve  
37 the quality and bring convenience to our everyday lives. However, at least 40% of these  
38 conventional (petroleum-based) plastics are used in short-term applications (e.g. throwaway

39 cups, utensils, plastic bags) and after being disposed the resulting waste can quickly lead to both  
40 terrestrial and marine environmental pollution.<sup>1, 2</sup> In brief, petroleum-based plastics are not  
41 sustainable, which drives the efforts to develop more environmentally benign plastics and  
42 materials. Some of the most commonly known bio-based and biodegradable plastics from  
43 renewable resources include polylactic acid (PLA), polyhydroxyalkanoates [PHAs, e.g.  
44 polyhydroxybutyrate (PHB) and poly(hydroxybutyrate-co-hydroxyvalerate) (PHBV)],  
45 thermoplastic starch, protein based plastics and the most abundant terrestrial polymer on earth,  
46 cellulose and its derivatives.<sup>3, 4</sup> Extensive application of these bioplastics, notably PHB and  
47 PHBV, will occur only after overcoming challenges including poor melt elasticity, low thermal  
48 degradation temperature, high crystallinity leading to brittleness for PHB, and low crystallization  
49 rate of PHBV.<sup>5, 6</sup> These features, especially low melt elasticity, limit their processability window,  
50 for example, during extrusion processes typically used for film, injection molding, blown-film  
51 manufacture, thermoforming, and fiber spinning.<sup>5, 7</sup>

52 Another critical issue is the millions of acres of forestland that have become prone to  
53 disease and insect attack in the Inland-Northwest of the United State, and high risk for  
54 catastrophic wildfire because of overstocked stands.<sup>8</sup> Approximately 6 million dry tons of sound  
55 dead wood from Idaho's National Forests is available. Of this, a sustainable level of over one  
56 million dry tons/year of logging residues and thinnings are potentially available for producing a  
57 variety of bioproducts. Therefore, there is a need to generate materials, such as cellulose, from  
58 this abundant woody biomass for use in value-added products.

59 Wood fibers have been used as fillers in thermoplastics to produce wood plastic composites  
60 (WPCs), which can be used in various applications (decks, railings and automotive) due to their  
61 well acceptable properties, low costs, and renewability.<sup>9</sup> WPC performances can be further

improved by exchanging wood fiber for cellulose fiber based on its improved thermal stability and mechanical properties. The cellulose fibers have been widely used as reinforcing filler into conventional thermoplastics, such as polypropylene and polyethylene.<sup>10-13</sup> Some mechanical properties, such as Young's modulus and tensile strength, were improved due to the addition of cellulose fibers.<sup>12</sup> However, the presence of a large number of hydroxyl groups results in a polar fiber surface; it is very difficult to disperse polar cellulose in a non-polar polymer matrix. This difficulty can result in poor interfacial bonding between the cellulose and the polymer matrix. Poor adhesion at the interface means that the full capabilities of the composite cannot be exploited and leads to low mechanical properties and a reduced life span.<sup>11</sup> Due to this reason, cellulose performs as simple filler not a true reinforcing agent. Research to improve the interfacial adhesion of biocomposites continues. Extensive studies have been conducted using coupling agents (e.g. maleated-polypropylene and maleated-polyethylene) to enhance the interfacial adhesion of fiber filler and polymer matrix.<sup>14</sup> Other efforts including chemical/physical treatments of fiber fillers to reduce the hydrophilicity of cellulose fiber surfaces have gained much more attention.<sup>15-18</sup> Although these modifications result in a decrease in moisture absorption and an increase in mechanical properties, biodegradability and weatherability, the processes used for cellulose modification are costly and involve toxic chemicals which could be a deterrent to its use.<sup>9, 19</sup>

By exchanging conventional plastics (e.g. polyethylene and polypropylene) with bioplastics (e.g. PHB and PHBV), which are less hydrophobic, will produce a fully bio-based composite material that is sustainably derived with good mechanical properties (flexural/tensile strength and stiffness) and biodegradation behaviors.<sup>17, 20-22</sup> Additionally, biocomposite properties can be improved by incorporating modified cellulose fibers into a bioplastic matrix.<sup>23-25</sup> Recently, the

85 reaction mechanism of a “grafting onto” method has been successfully studied by grafting PHB  
86 polymer onto cellulose fibers through the reactive extrusion processing with the use of small  
87 amount of peroxide (Fig. 1).<sup>26</sup> When the peroxide is exposed to heat during extrusion it will  
88 decompose into strong free radicals which tend to abstract H’s from the polymer and cellulose  
89 molecular chains and initiate the grafting between the two phases in composites. Via the strategy  
90 of grafting PHB or PHBV onto cellulose this will retain the stiffness of cellulose and the  
91 flexibility of the polymer matrix (PHBV especially). In addition, the use of reactive extrusion  
92 which limits the use of solvents and the treatment of cellulose, which makes it a valuable  
93 alternative to improve the performances of cellulose reinforced bioplastics composites.  
94 Chemically coupling PHB to cellulose fiber provides excellent stress transfer and hydrophobic-  
95 hydrophilic compatibility between the two phases in the biocomposite material with no external  
96 non-biodegradable coupling agent or compatibilizers are employed. This in-line modification  
97 process can be applied easily to industrial scale production of biocomposites.

98 Our aim in this study was to isolate  $\alpha$ -cellulose ( $\alpha$ Cell) fibers from in-risk lodgepole pine  
99 wood. The “grafting onto” strategy was used to prepare cellulose-graft-PHBV ( $\alpha$ Cell-g-PHBV)  
100 or  $\alpha$ Cell-g-PHB biocomposites with improved properties due to enhanced interfacial adhesion.  
101 The surface morphology, chemistry, and crystalline structure of the modified biocomposites  
102 were characterized by microscopy, Fourier transform infrared spectroscopy (FTIR) spectroscopy,  
103 and wide angle X-ray diffraction (WAXD), respectively. Tensile tests were conducted on the  
104 injection molded dog-bone specimens. Thermal properties, such as thermal transition and  
105 crystallinity, thermal degradation, dynamic flexural properties, and thermal mechanical  
106 properties of biocomposites were assessed by thermal analysis.

107

## 108 **2. Results and discussion**

### 109 **2.1. $\alpha$ -Cellulose fiber analysis**

110 The chemical composition of the original wood and  $\alpha$ Cell fibers for  $\text{CH}_2\text{Cl}_2$  extractive,  
111 lignin, and carbohydrate content/composition was determined and shown in Table 1.<sup>27</sup>  
112 Lodgepole pine wood was comprised of 39% cellulose. After isolation,  $\alpha$ Cell had a 96% purity  
113 based on glucose content.

114 The  $\alpha$ Cell fiber size (weight) distribution was determined using an automatic vibratory  
115 sieve shaker. As shown in Table 2, the major part of the  $\alpha$ Cell fiber was smaller than 250  $\mu\text{m}$ ,  
116 with 65% of the fibers were between 70 and 177  $\mu\text{m}$ . Further information concerning  $\alpha$ Cell fiber  
117 size (length and diameter) was achieved by optical microscopy. The micrographs of each  
118 screened fraction are shown in Fig. 2. Single fibers were observed (rod like), especially for the  
119 fractions that were  $> 60$  mesh (Fig. 2c, 2d, 2e and 2f). The length (L) and diameter (d) of these  
120 fibers fractions were measured and averaged from 200 fibers. The weight normalized fiber L and  
121 d were 0.5 mm and 15.1  $\mu\text{m}$ , respectively. The L of the  $>80$ ,  $>100$ , and  $>200$  mesh classified  
122 fibers ranged between 0.6 and 0.8 mm, while the d of these fractions were comparable around 19  
123  $\mu\text{m}$ . The fines fraction ( $<200$  mesh) had a much smaller L (0.4 mm) and d (14  $\mu\text{m}$ ) than the  
124 coarser fractions. The 40 and 60 mesh fractions comprised of fiber bundles (Fig. 2a and 2b);  
125 hence the fiber length and diameter were difficult to be determined. As shown in Table 2, 59%  
126 (weight fraction) of the  $\alpha$ Cell fibers had an aspect ratio (L/d) of 31 and is considered  
127 microcrystalline.<sup>28</sup> The aspect ratio was shown to decrease with a finer mesh size.

128

### 129 **2.2. Reaction conditions optimization and grafting efficiency**

130 The effect of two factors (DCP concentration: 2-5 %; reaction time,  $t_R$ : 5-15 min) was

investigated to optimize the grafting efficiency between  $\alpha$ Cell and PHB (or PHBV) polymer matrix. The extruded composite strands were extracted with  $\text{CHCl}_3$  to remove any nonreacted PHB/PHBV or smaller homopolymer molecules and then filtered to remove nongrafted  $\alpha$ Cell fibers (Note:  $\text{CH}_2\text{Cl}_2$  and  $\text{CHCl}_3$  used in this research were recovered for reuse to reduce environmental impact). The dry weight of the copolymer gels was recorded and gel% was calculated with respect to the dry weight of the starting materials. The optimized total concentration of DCP and  $t_R$  were 2% and 10 min, respectively, to give the maximum  $\alpha$ Cell-g-PHB and  $\alpha$ Cell-g-PHBV copolymer gel% and well mixed biocomposites samples. The degree of grafting efficiency (GE%, weight % of PHBV (or PHB)) grafted onto  $\alpha$ Cell backbone was calculated),

$$\text{GE}\% = (W_{\text{gf}} - W_{\alpha\text{Cell}})/W_{\text{PHB/PHBV}} \times 100 \quad (1)$$

where  $W_{\text{gf}}$ ,  $W_{\alpha\text{Cell}}$ , and  $W_{\text{PHB/PHBV}}$  are the weights of the grafted copolymer gel recovered after Soxhlet extraction, initial  $\alpha$ Cell, and initial PHB (or PHBV) weights, respectively.<sup>19</sup> The simple blended composites were also extracted in the same way as grafted samples. The GE% of simple blends was < 0.5%, and thus being neglected in this study. The highest GE% value of  $\alpha$ Cell with PHBV was 45% but that with PHB was 35%, when biocomposites were processed under the same optimized reactive conditions (DCP: 2 wt%;  $t_R$ : 10 min). As shown in Fig. 1, the grafting reactions occurred at the tertiary  $-\text{CH}$  sites of PHB and PHBV. PHBV copolymer has one additional tertiary  $-\text{CH}$  site in each comonomeric unit as compared with the PHB, therefore, higher GE% was observed for  $\alpha$ Cell-g-PHBV copolymers. It is worth noting that the high GE% can also be ascribed to partial crosslinking/grafting of the polymer matrices (Fig. 1a).

### 2.3. Surface morphology of biocomposites

154 The SEM micrographs of the biocomposites surfaces are shown in Fig. 3. The grafted  
155 biocomposites (Fig. 3b and 3d) showed a continuous interphase between fiber and polymer  
156 matrix, indicating that the polymer was grafted onto  $\alpha$ Cell by peroxide initiation. In contrast,  
157 blends of  $\alpha$ Cell-PHB and  $\alpha$ Cell-PHBV showed discrete zones of PHB or PHBV and  $\alpha$ Cell fibers  
158 (Fig. 3a and 3c), and the fibers were easily pulled out from the matrix when microtomed. A  
159 similar trend was observed with peroxide treated sisal fibers filled in polyethylene composites  
160 system.<sup>29</sup> An improved compatibility between  $\alpha$ Cell and the polymer matrix was obtained due to  
161 peroxide induced grafting (Fig. 3b and 3d). It was therefore postulated that the grafted copolymer  
162 formed on the interfaces of  $\alpha$ Cell and PHBV (or PHB) coupled the hydrophilic  $\alpha$ Cell to the  
163 hydrophobic PHBV (or PHB) matrix (Fig. 1). Micrographs at magnification of 200x (Fig. 3e to  
164 3h) showed the cellulose fibers have been separated during the mixing extrusion process are well  
165 dispersed in the polymer matrices, especially in the grafted composites as compared to the  
166 simple blends. On average a random orientation of cellulose fibers into the polymer matrices for  
167 both grafting as well as their simple blends was observed. However, the surfaces of  $\alpha$ Cell fibers  
168 became rougher and more amorphous due to peroxide treatment, which may provide higher  
169 possibility of access for melted polymers to attach onto during composites processing. This  
170 further suggested better interfacial adhesion between  $\alpha$ Cell fibers and PHB (or PHBV) due to  
171 grafting.

172

#### 173 **2.4. Characterization of biocomposites by FTIR and XRD**

174 The crystalline nature of PHB and its composites materials significantly affect their  
175 mechanical properties and processability as well. Copolymerization of 3-hydroxybutyrate with  
176 other monomeric units, such as 3-hydroxyvalerate (3HV), to form PHBV copolymers has been



177 proven to be one of the most effective strategies to reduce the crystallinity of PHB. These  
178 copolymers showed improved mechanical properties as a result of being less crystalline, which is  
179 contributed to the presence of dislocations, crystal strain and smaller crystallite sizes due to the  
180 disruption of 3HV unit to PHB crystal lattice.<sup>30</sup> The degree of crystallinity of PHB and PHBV  
181 can be obtained by a combination of FTIR and WAXD analyses. Fig. 4a showed the FTIR  
182 spectrum of the composites samples with characteristic absorbance peaks arising from  $\alpha$ Cell and  
183 PHBV (or PHB). The absorbance bands at 980, 1230, 1720  $\text{cm}^{-1}$  were assigned to the crystalline  
184 regions of PHB or PHBV polymers, and as expected the intensities of these peaks were lower for  
185 PHBV based samples than those of PHB's. This further indicated that the copolymer PHBV was  
186 less crystalline than PHB. It was shown that the intensities of these crystalline bands for the  
187 grafted composites were reduced significantly, due to grafting, compared to their simple blends  
188 ( $\alpha$ Cell-PHB and  $\alpha$ Cell-PHBV). The shoulder at 1740  $\text{cm}^{-1}$  of the band centered at 1720  $\text{cm}^{-1}$  was  
189 assigned to the carbonyl (C=O stretching) group from the amorphous region of PHB and PHBV,  
190 and it became more intense after grafting (see the peak fitting of C=O region showing in Fig. 4c).  
191 This observation suggested that successful grafting between the matrix (PHB and PHBV) and  
192  $\alpha$ Cell reinforcement was achieved, which would hinder the crystallization of PHBV (or PHB)  
193 macromolecular chains from melts, resulting in a higher proportion of amorphous PHBV (or  
194 PHB). It is worth noting that the reduction of crystallinity of grafted composites could also be  
195 attributed to the crosslinking of polymer matrix (PHB-PHB or PHBV-PHBV). In addition, due to  
196 the high degree of crystallinity/rigidity with the less mobile cellulose, only radicals formed on its  
197 surfaces of the crystalline and amorphous regions would be more accessible to the molten  
198 PHB/PHBV (with radicals) which would then be able to form grafts in the composites.  
199 Therefore, the band at 1429  $\text{cm}^{-1}$  (symmetric  $-\text{CH}_2$  bending), a characteristic of amorphous

cellulose, which appeared in the grafted composites, again providing further evidence that grafting had occurred. To further confirm that the crystallinity was reduced due to grafting, quantitative analyses of the spectra for PHBV (and PHB) and cellulose crystallinity were performed. The spectral ratio of 1370/2900  $\text{cm}^{-1}$  bands (total crystallinity index, TCI, Equation 3) was shown to be proportional to the crystallinity degree of cellulose, while the band ratios 1720/1740  $\text{cm}^{-1}$  (carbonyl index,  $I_{\text{C=O,PHB/PHBV}}$ , Equation 4) and 1230/1450  $\text{cm}^{-1}$  (C-O index,  $I_{\text{C-O,PHB/PHBV}}$ , Equation 5) reflect the crystallinity of PHB or PHBV polymers. Quantitative analysis of the infrared crystallinity ratios were calculated from the peak fitted spectra of the  $\text{-C-H}$  (and  $\text{-CH}_2$  stretching) at 2900  $\text{cm}^{-1}$  (Fig. 4b), the carbonyl region (1800-1680  $\text{cm}^{-1}$ ) for PHB (Fig. 4c), and  $\text{-C-H}$  bending centered and 1370  $\text{cm}^{-1}$  from crystalline region for cellulose (Fig. 4d). The analyzed data for neat PHB and PHBV,  $\alpha\text{Cell}$ ,  $\alpha\text{Cell-PHB}$  blend,  $\alpha\text{Cell-PHBV}$  blend, and grafted composites ( $\alpha\text{Cell-g-PHB}$  and  $\alpha\text{Cell-g-PHBV}$ ) are given in Table 4. The addition of  $\alpha\text{Cell}$  resulted in a reduction in PHBV (and PHB) crystallinity of the blended composites slightly, while grafting reduced all the three crystallinity indices significantly. The grafted copolymers between  $\alpha\text{Cell}$  and PHBV (or PHB) matrix had improved compatibility, which would improve the stress transfer between the two phases of hydrophilic cellulose and hydrophobic polymer.<sup>26</sup>

To further investigate the effect of the grafting on the crystalline structures of PHB and cellulose segments, vacuum dried samples were subjected to WAXD analysis (Fig. 5).  $\alpha\text{Cell}$  showed four crystalline peaks corresponding to (101), (10-1), (002), and (040) planes showing at  $2\theta$  scale of 14°, 16°, 22°, and 35°, respectively. The maximum diffractogram intensity was observed in the (002) plane. This is a typical pattern of cellulose I. Both PHB and PHBV samples showed crystalline peaks at  $2\theta$  near to 13°, 17°, 20°, 21°, 22°, 26° and 27°, respectively, ascribing to planes of (020), (110), (021), (101), (121), (040), and (200). The most intense peak

for PHB and the composites samples was at  $17^\circ$ , whereas the most intense peak for PHBV based samples was observed at  $13^\circ$ . It is assumed that the reduced crystallinity of PHBV as compared to PHB could be the main contributor to peak broadening for all the crystalline planes. Such results can be explained by the reason that the presence of  $\alpha$ Cell suppressed the nucleation of polymer, especially for PHBV, in the simple blends. The similar reduction of PHB and PHBV crystallinity was also found in PHB/cellulose (Whatman CF1) and PHBV/PLA/PBS (poly(butylene succinate)) blends, respectively.<sup>26</sup>

The Gaussian function was used for peak fitting of the WAXD diffractograms, meantime, the FWHM values were obtained accordingly. Crystallinity indices were calculated from the ratios of fitted peak intensities, and crystal sizes according to Scherrer's formula using a shape constant  $K = 0.9$  for PHBV (and PHB) and cellulose (Table 3). Crystallinity index<sup>19</sup> and average crystal width were 59.1% ( $\text{CrI}\%_{\alpha\text{Cell}}$ , Equation 6) and 250 Å ( $D_{002}$ ) for  $\alpha$ Cell, 61% ( $\text{CrI}\%_{\text{PHB}}$ , Equation 7) and 1274 Å ( $D_{020}$ ) for PHB, and 36.2% ( $\text{CrI}\%_{\text{PHBV}}$ , Equation 8) and 190 Å ( $D_{020}$ , Equation 9) for PHBV, respectively. PHBV had a much smaller crystal size and significantly lower degree of crystallinity than PHB based materials. The lower crystallinity for PHBV would result in a more ductile/flexible material than PHB. The large crystal size which would induce inter-spherulitic cracks is one of the leading reasons for the brittleness of PHB.<sup>31, 32</sup> The simple blending of PHB (or PHBV) with  $\alpha$ Cell was shown to reduce slightly the crystallinity indices and crystal sizes of the PHB (or PHBV) polymer. Nevertheless, the decreasing trend was more significant as a result of grafting (Table 3), which contributed to new C–C bonds being formed which limited the numbers of PHB or PHBV molecular chains involved in crystallization processes from the polymer melt. The PHB and PHBV molecular chains with more grafted sites would contribute to an increase in the amorphous component due to inhibited crystallization.

246 These results were consistent with the findings from infrared crystallinity indices results and  
247 supported the lowering in crystallinity of the polymer matrix by grafting. Smaller crystal sizes of  
248 the grafted biocomposites were observed suggesting that the formation of large crystals of either  
249 PHBV (or PHB) was restricted. This could be one of the major reasons for to the improved  
250 mechanical properties of grafted biocomposites as compared to the simple blends of cellulose  
251 and polymer (PHB or PHBV).

252

## 253 **2.5. Influence of grafting on mechanical properties of biocomposites**

254 The density ( $\rho$ ) and tensile properties (strength ( $\sigma$ ), modulus ( $E$ ), elongation at break ( $\epsilon$ ),  
255 and energy at break (EAB)) of molded neat bioplastics and their composites are given in Table 4.  
256 The  $\rho$  of all PHB, PHBV and biocomposites samples ranged from 1.10 to 1.18 g/cm<sup>3</sup> and thus  
257 was not a major factor causing differences in tensile properties between treatments. The density  
258 of the biocomposites remains similar to neat plastics, which may be because the density of  
259 cellulose fiber was about 1.5 g/cm<sup>3</sup> and only 20% of cellulose was used in the composites.

260 According to Maldas and Kokta,<sup>33</sup> the mechanical properties of short-fibers and plastic  
261 composites are strongly influenced by the fiber content, fiber morphology (size and shape), the  
262 orientation (random or unidirectional) of the fillers, and the fiber-polymer adhesion. The  $\sigma$  is  
263 more dependent on the fiber-polymer interaction (compatibility) while  $E$  is dependent more on  
264 fiber content and morphology (i.e. aspect ratio).<sup>14</sup> The grafted biocomposites resulted in an  
265 increase of  $E$  and  $\sigma$ . The  $E$  values of  $\alpha$ Cell-PHB and  $\alpha$ Cell-PHBV biocomposites were higher  
266 than those of the neat PHB and PHBV, respectively. This indicated the reinforcement effect of  
267 cellulose fibers to the polymer matrices. On the other hand, the increments of  $E$  were much more  
268 significantly for the grafted composites due to grafting between cellulose and polymer matrices.

269 The neat PHBV and blended  $\alpha$ Cell-PHBV composite showed lower  $E$  as compared to PHB and  
270 blended  $\alpha$ Cell-PHB, which was attributed to the lower tensile properties of PHBV.<sup>34</sup> Whereas,  
271 the grafted  $\alpha$ Cell-g-PHBV composites showed comparable  $E$  to neat PHB, suggesting the  
272 reinforcement of  $\alpha$ Cell fibers was improved via grafting. Moreover, the increased  $E$  of polymer  
273 matrix due to crosslinking between polymer chains (see Fig. 1) would partially contribute to the  
274  $E$  increase of grafted composites.

275 The ductility reflected by  $\epsilon$  values was significantly higher for PHBV based composites,  
276 which contributed to higher flexibility of PHBV (22% HV) than PHB homopolymers.<sup>32</sup> Work on  
277 PHB/PHBV-flax fiber composites showed higher values of  $\epsilon$  for PHBV based composites than  
278 PHB based composites.<sup>34</sup> For composites made from PHB or PHBV,  $\sigma$  at ultimate yield point  
279 was increased with the addition of  $\alpha$ Cell fibers accompanied with a decrease in  $\epsilon$ . In comparison  
280 with PHB and its composites the copolymer PHBV based composites showed a somewhat lower  
281  $\sigma$ , around 12 MPa. For the grafted composites ( $\alpha$ Cell-g-PHB and  $\alpha$ Cell-g-PHBV), higher  $E$  and  $\epsilon$   
282 were obtained when compared to their simple blends. This finding suggests that grafting didn't  
283 just enhance the fiber-polymer matrix interaction but also increased the ductility of the resulting  
284 composite due to crosslinking between polymer chains (PHB-PHB and PHBV-PHBV). This was  
285 possibly caused by a lower degree of crystallinity of cellulose and the bioplastic as discussed in  
286 the previous section (Table 3). The toughness of all samples was assessed by their EAB values  
287 (Table 4). Neat PHB and PHBV showed respective toughness of 0.33 and 0.45 J, indicating that  
288 the PHBV copolymers had an improved toughness than PHB. EAB was also shown to increase  
289 with addition of 20%  $\alpha$ Cell fibers. For example, the EAB of the simple blends,  $\alpha$ Cell-PHB and  
290  $\alpha$ Cell-PHBV, were 0.41 and 0.45 J, respectively. A similar result was obtained in a study on the  
291 fracture toughness changes due to addition of 10 to 30 % wheat straw fibers into PHB matrix.<sup>35</sup>

292 Grafting of PHB/PHBV onto  $\alpha$ Cell improved the toughness significantly ( $p < 0.05$ ) by 46% and  
293 44%, respectively, as compared to their simple blends,  $\alpha$ Cell-PHB and  $\alpha$ Cell-PHBV.

294 According to Kelly-Tyson theory, the critical fiber length ( $L_{c/\alpha Cell}$ ) is used to evaluate the  
295 fibers performing as reinforcement or just filler to the polymer matrix. It is assumed fiber  
296 morphology (length and aspect ratio) would not be influenced significantly during single screw  
297 mixing/extrusion processing, for example by shearing, and thus the  $L_{c/\alpha Cell}$  can be estimated as  
298 follows:

$$299 \quad L_{c/\alpha Cell} = \frac{\sigma_{\alpha Cell} \times d_{\alpha Cell}}{2\tau} \quad (2)$$

300 where  $\sigma_{\alpha Cell}$  is the  $\alpha$ Cell fiber strength,  $d_{\alpha Cell}$  is the fiber diameter that was averaged based on the  
301 weight fraction % ( $d_{\alpha Cell} = 0.015$  mm), and  $\tau$  is the interfacial bonding strength of fiber and  
302 polymer matrix.  $\sigma_{\alpha Cell}$  and  $\tau$  values were obtained from the literature, respectively at 1.5 GPa and  
303 8.8 MPa.<sup>34</sup> Hence, the  $L_{c/\alpha Cell}$  value was calculated to be 1.2 mm. Based on the fiber distribution  
304 analysis as shown in Table 2, the size of  $\alpha$ Cell fibers were lower than the estimated critical  
305 length required to give an adequate stress transfer between fiber and PHB (or PHBV) polymer  
306 matrix. This again explained the low  $\sigma$  of simple blended composites without grafting. However,  
307 the grafted composites ( $\alpha$ Cell-g-PHB and  $\alpha$ Cell-g-PHBV) showed improved tensile properties  
308 due to better stress transfer caused by the newly formed bonds (Fig. 1) between the fiber and  
309 polymer.

310

## 311 **2.6. Thermal properties of the bioplastics and biocomposites**

### 312 **2.6.1. Thermal degradation behavior**

313 Thermal degradation for neat PHB and PHBV and biocomposites was investigated by  
314 thermogravimetric analysis (TGA) and the degradation temperatures are given in Table 5. Neat

PHB and PHBV started ( $T_{\text{onset}}$ ) to degrade at 263 and 250 °C, and completed degradation ( $T_{\text{comp}}$ ) at 303 and 292 °C, respectively. The HV units in PHBV did not improve the thermal stability of the polymer, which agrees to previous research.<sup>36</sup> Degradation (98% mass loss) occurred in one step for the neat polymers. This was ascribed to chain scission and hydrolysis mechanisms of PHB and PHBV, resulting in a lower molar mass fragments and the formation of crotonic acid.<sup>36</sup> All the biocomposite samples showed two degradation stages, of which the first stage was ascribed to the PHB/PHBV degradation while the second stage was from  $\alpha$ Cell degradation. The  $T_{\text{onset}}$  for the  $\alpha$ Cell-PHB and  $\alpha$ Cell-PHBV blends was close to neat PHB/PHBV, and 80% of the biocomposite samples degraded in the first stage, aligning to the formulation ( $\alpha$ Cell:PHB = 1:4;  $\alpha$ Cell:PHBV = 1:4). These data indicated that simple blending of  $\alpha$ Cell fibers with PHB/PHBV did not improve the thermal stability of the polymer matrix. These results are consistent with findings for PHB and cotton fiber blends.<sup>26</sup> However, the grafted biocomposites ( $\alpha$ Cell-g-PHB and  $\alpha$ Cell-g-PHBV) had a higher  $T_{\text{onset}}$  by > 10 °C than neat PHB and PHBV. The temperature of maximum decomposition rate ( $T_{\text{max}}$ ) in the first stage for sample  $\alpha$ Cell-g-PHB was > 10 °C higher than  $T_{\text{max}}$  of neat PHB (285 °C). Furthermore, the  $T_{\text{max}}$  in the second stage due to  $\alpha$ Cell ( $T_{\alpha\text{Cell}}$ ) component degradation was also increased compared to  $\alpha$ Cell-PHB blends. Similar results were obtained for PHBV based biocomposites. Grafting modification improved the thermal stability for both the reinforcement ( $\alpha$ Cell) and the polymer matrix (PHB and PHBV). Grafting between  $\alpha$ Cell and polymer matrix and a small amount of cross-linked PHB or PHBV resulted in forming more C–C bonds (Fig. 1b and 1c), which would require more energy/thermal input to decompose the resultant grafted biocomposites.

336

337 2.6.2. Different scanning calorimetry (DSC) analysis

338 The thermal events of glass, crystallization, melting transitions of neat PHB/PHBV, simple  
339 blends, and grafted biocomposites were studied using DSC. Fig. 6 shows the DSC thermograms  
340 for neat PHB and PHBV, and their biocomposites in the temperature range of -30 to 180 °C.  
341 Thermal transitions as well as the degree of crystallinity ( $X_c$  %, Equation 10) of the materials are  
342 given in Table 6. Neat PHB showed a glass transition ( $T_g = 4.9$  °C) and double endothermic  
343 peaks ( $T_{m1} = 159$  °C and  $T_{m2} = 169$  °C, labeled from low to high temperatures) corresponding to  
344 melting points in the second heating scan (Fig. 6). The addition of 20 wt%  $\alpha$ Cell to neat PHB  
345 ( $\alpha$ Cell-PHB blend) resulted in a slight increase in  $T_g$  (5.3 °C), while the grafted  $\alpha$ Cell-g-PHB  
346 biocomposites increased  $T_g$  by 2 °C. The  $X_c$  % of  $\alpha$ Cell-PHB and  $\alpha$ Cell-g-PHB biocomposites  
347 was reduced by 2.4 % and 10.4 %, respectively, as compared to neat PHB (53.4%). The  
348 reduction in crystallinity (or amorphous phase increase) observed by DSC agreed with results of  
349 FTIR and WAXD analyses (Table 4).

350 The  $T_g$  is directly associated with the macromolecular mobility of polymer chains, hence, a  
351 lower  $X_c$  % will require less energy to move the polymer chains in the amorphous phase.  
352 Therefore, a lower  $T_g$  is expected to transit the polymer from a glassy to a rubbery state if only  
353 polymer matrix itself was modified by DCP as reported in our previous studies.<sup>37</sup> However,  
354 higher  $T_g$  was observed for  $\alpha$ Cell-PHB and  $\alpha$ Cell-g-PHB biocomposites, which was possibly due  
355 to the limited polymer molecular chain mobility from the rigid  $\alpha$ Cell fibers. Bhardwaj et al.<sup>38</sup>  
356 found the similar trend for  $T_g$  of recycled fibers reinforced PHBV composites. In  $\alpha$ Cell-g-PHB,  
357 extra C–C bonds due to grafting between the fibers and polymer matrix would provide further  
358 restrictions in the polymer chain mobility as compared to  $\alpha$ Cell-PHB, and hence  $T_g$  was shifted  
359 to a higher temperature.

360 During DSC analysis, the melt peaks,  $T_{m1}$  and  $T_{m2}$ , of  $\alpha$ Cell-PHB were increased slightly



361 from 159 to 161 °C and from 169 to 171 °C, respectively, as compared to neat PHB. While the  
362  $\alpha$ Cell-g-PHB composites showed  $T_{m1}$  and  $T_{m2}$  values respectively at 155 and 164 °C. This  
363 reduction is likely caused by the broadening molar mass distribution of the polymer matrix due  
364 to grafting/cross-linking between polymer chains. A similar trend was observed for  $T_g$ ,  $T_m$ 's and  
365  $X_c$  % for PHBV and its biocomposites samples (Table 6). However, a more apparent change was  
366 seen in the grafted  $\alpha$ Cell-g-PHBV material. This could be contributed to the chemical structure  
367 of PHBV/PHB polymers<sup>26</sup> and the higher GE% of PHBV.

368 DSC can easily detect the significant heat release accompanying the exothermic  
369 crystallization process of PHB and PHBV. The  $T_c$  is an important thermal parameter to describe  
370 the crystallization behavior of fiber and plastic composites (Fig. 6 and Table 6). A sharp  
371 crystallization peak was observed for all PHB-based samples and neat PHBV in the cooling scan.  
372 An increase in  $T_c$  was observed when  $\alpha$ Cell fibers were incorporated into the PHB matrix ( $T_c$  =  
373 85 °C). This suggested that the  $\alpha$ Cell fibers induced nucleation of PHB and initiated the  
374 crystallization at higher temperature (i.e. > 121 °C) from melt. Grafting resulted in a decrease in  
375  $T_c$  (103 °C) of  $\alpha$ Cell-g-PHB as compared to the blended  $\alpha$ Cell-PHB material. The corresponding  
376 enthalpy ( $\Delta H_c$ ) of  $\alpha$ Cell-g-PHB during crystallization was reduced by 12 % due to grafting. This  
377 reduction was most likely due to the lower  $X_c$  % of PHBV (or PHB) in the grafted biocomposites  
378 (Table 6). The exothermic peak of neat PHBV was broader than PHB, which indicated  
379 nucleation and crystal growth were much slower in PHBV. This finding agrees with the  
380 literature.<sup>39</sup> The  $T_c$  of PHBV in  $\alpha$ Cell-PHBV was reduced significantly by 28 °C as compared to  
381 that of neat PHBV. This indicated that the addition of fibers resulted in a slower diffusion and  
382 migration of PHBV copolymer chains to the surface of the nucleation point, thus decreasing  $T_c$   
383 during cooling of the  $\alpha$ Cell-PHBV melt. For the grafted biocomposites,  $\alpha$ Cell-g-PHBV, no

384 exothermic crystallization peak ( $T_c$ ) was observed by DSC in the cooling scan. The reduction in  
385 the  $X_c$  %,  $T_m$ 's, and  $T_c$  was in agreement with the results reported in the case of poly( $\epsilon$ -  
386 caprolactone) (PCL) reinforced with PCL diol grafted cellulose nanocrystals using toluene 2,4-  
387 diisocyanate as coupling agent.<sup>40</sup> In addition, an exothermal (cold crystallization) peak ( $T_{cc}$ ) was  
388 observed in the heating scan of PHBV based composites (Fig. 6b). This peak was shifted from 56  
389 °C to higher temperature (77 °C) due to grafting, indicating the delay of crystallization kinetics  
390 (increased crystallization rate) with incorporation of cellulose fibers and grafting crosslinks.

391

### 392 2.6.3. Dynamic flexural properties

393 Dynamic mechanical analysis (DMA) was performed on PHB, PHBV and their composites  
394 in three-point bending mode to determine the storage modulus ( $E'$ ) which determines the  
395 dynamic rigidity of a material. The  $E'$  values of the samples at 30, 50 and 70 °C are given in  
396 Table 7. The  $E'$  values (30 °C) of PHB increased by 33% and 60%, respectively by simple  
397 addition of  $\alpha$ Cell and grafting of  $\alpha$ Cell, respectively. The  $\alpha$ Cell-PHBV and  $\alpha$ Cell-g-PHBV  
398 biocomposites had also shown significantly increased  $E'$  values by 88 and 127%, respectively, as  
399 compared to neat PHBV. PHB had a higher  $E'$  due to its high brittleness than PHBV. The higher  
400  $E'$  values for the grafted composites could be contributed to an improved compatibility and  
401 dispersion of  $\alpha$ Cell fibers in the PHB/PHBV matrix as compared to their blends ( $\alpha$ Cell-PHB and  
402  $\alpha$ Cell-PHBV). Better stress transfer between the  $\alpha$ Cell and PHB/PHBV interfaces of the grafted  
403 composites would also improve the rigidity of either PHB or PHBV composites.

404 The loss tangents ( $\tan\delta$ ) of the various samples at 30, 50 and 70 °C are given in Table 7 as  
405 well.  $\tan\delta$  values were shown to have a minimum at 50 °C. For both PHB and PHBV based  
406 composites their  $\tan\delta$  values were less than their matrix, especially < 30 °C. According to our

previous findings of the fiber-matrix interfacial bonding,<sup>9, 25</sup> the reduction of  $\tan\delta$  could indicate better interfacial adhesion of these two phases in grafted biocomposites as compared to their simple blends without being grafting modified.

The interfacial bonding between wood fiber and polyethylene matrix was successfully evaluated by the adhesion factor ( $A$ ) (Equation 11).<sup>9</sup>  $A$  values derived from DMA data at 30 °C are given in Table 7. Lower  $A$  values of the grafted composites was an indicator of improved interfacial interaction between the two phases,  $\alpha$ Cell and PHB or PHBV, as compared to their blend. These data provided supportive evidence that an improved interaction was achieved by grafting.

## 2.7. Dynamic rheological properties

The polymer melt properties of the biocomposites were determined by dynamic parallel plate rheometry. Fig. 7 shows the dynamic elastic and viscous moduli ( $G'$  and  $G''$ ) of PHB (175 °C) and PHBV (170 °C) based materials under isothermal conditions. For the PHB based composites both  $G'$  and  $G''$  were shown to increase with frequency ( $\omega$ , rad/s). At lower  $\omega$ ,  $G''$  was higher than  $G'$  for PHB and the simple blended composite ( $\alpha$ Cell-PHB). This indicated that these samples were more liquid-like, although the incorporation of  $\alpha$ Cell made the resulting composites slightly more elastic which was reflected by the less difference between  $G''$  and  $G'$  values. However, grafting improved the  $G'$  slightly compared to the simple blends (see Fig. 7a,  $G' > G''$ ), suggesting the grafted PHB onto  $\alpha$ Cell showed good elastic properties. For instance,  $G'$  was increased from 12 Pa (PHB) to 1000 Pa by addition of  $\alpha$ Cell and further improvement to 1400 Pa was obtained by grafting ( $\alpha$ Cell- $g$ -PHB). PHBV,  $\alpha$ Cell-PHBV and  $\alpha$ Cell- $g$ -PHBV showed higher  $G'$  and  $G''$  values than PHB series which clearly showed that the PHBV

430 copolymer had relatively better melt strength. At lower frequency, i. e.  $\omega < 10$  rad/s,  $G' > G''$  was  
431 observed for PHBV and its composites, suggesting the PHBV (22 mol% HV) has better melt  
432 strength (higher melt viscosity) than PHB. Conflicting results were observed in other studies on  
433 the PHBV with lower HV content (12 mol%).<sup>41</sup> In addition, due to relatively longer chain of HV  
434 as compared to HB more degrees of chain entanglements in PHBV would be presented as  
435 compared to PHB. Found in previous researches,<sup>37, 42</sup> the melt elasticity is positively proportional  
436 to the molecular chain entanglement and the degree of long chain branching. Although pure  
437 PHBV is a linear polymer, the presence of HV monomeric units could provide long chain  
438 branching structures. Compared to pure PHB homopolymers, PHBV can be considered as a  
439 branched form of PHB, and thus PHBV and its composites showed  $G' > G''$ . Similar trend ( $G' >$   
440  $G''$ ) was observed between the long chain branched and linear polyethylene samples.<sup>42</sup>  
441 The polymer melt of the copolymer PHBV had better elasticity than that of PHB (Fig. 7b). The  
442 addition of  $\alpha$ Cell to PHBV increased its  $G''$  by 30%. The effect of grafting of  $\alpha$ Cell onto PHBV  
443 further increased  $G'$  (5-fold) and  $G''$  (7-fold) significantly as compared to the blend. The  
444 improvements of PHBV properties, relative to PHB, are most likely due to the higher grafting  
445 efficiency of PHBV when using the same reactive parameters.

446 The cross-over modulus ( $G_c = G' = G''$ ) of grafted PHB and PHBV biocomposites shifted  
447 towards higher  $\omega$ . The  $G_c$  was increased from 670 Pa for PHB to 1070 Pa by addition of  $\alpha$ Cell  
448 and was further increased to 2300 Pa by grafting. A similar trend was also observed for the  
449 PHBV composite series. The mean relaxation time (at  $G_c$ ), which is the ratio of the elastic to the  
450 viscous response,<sup>43</sup> was increased for PHB based composites whereas it was decreased for  
451 PHBV based composites due to grafting. This difference might be mainly due to the higher  
452 molecular weight of PHBV as well as the fraction of crosslinked polymer (PHB-PHB,

453 PHBV/PHBV) in the grafted composites. This can result in higher molar mass distribution of  
454 grafted PHBV based composites than that of PHB based composites.

455  $\alpha$ Cell-g-PHBV behaved like a solid with a G' of about 5 kPa. This could be partially due to  
456 long chain branching between crosslinked PHBV (or PHB) chains. There was less of a  
457 magnitude increase in moduli for  $\alpha$ Cell- PHB composites as compared to  $\alpha$ Cell-PHBV due to  
458 grafting. This further indicated the higher grafted efficiency of PHBV based composites with  
459 incorporation of same peroxide concentration. The relatively lower degree of elasticity for PHB  
460 and PHBV compared with their composites was likely caused by their higher chain stiffness, and  
461 this phenomenon agrees with their higher  $T_m$  values. Therefore, peroxide induced free radical  
462 initiation to create crosslinks and grafting is a practical approach to improve the industrial melt  
463 processability of PHB and PHBV as well as their biocomposites.

464

## 465 **3. Experimental**

### 466 **3.1. Materials**

467 Lodgepole pine (*Pinus contorta*) lumber was sourced locally (Southern Idaho, USA). The  
468 lumber was chipped then Wiley-milled to pass through a 40 mesh screen. Wood fiber (500 g)  
469 was extracted with acetone (3 L, 99.5%, Macron Fine Chemicals) to yield 8.0 g of extractives.  
470 Air dried extractives free wood fiber (100 g batches) was treated with 3.2 L deionized water  
471 containing 30 g NaClO<sub>2</sub> (99%, Tech. Grade, Ricca Chemicals, USA) and acetic acid (20 mL,  
472 99.7%, Fisher ACS, USA) at 70 °C for 1 h, and this was repeated four more times to a total of 6  
473 h.<sup>44</sup> The holocellulose fibers (150 g batch) was then extracted with 17.5% NaOH (4 L) solution  
474 at 20 °C with constant stirring for 5 h to afford  $\alpha$ Cell fibers by removing the hemicelluloses. The  
475  $\alpha$ Cell was recovered by filtering through a polypropylene screen (100 mesh) and washed

476 exhaustively with water under vacuum. Then, 10% aqueous acetic acid (2 L) was added to the  
477  $\alpha$ Cell and left to soak for 5 min. The  $\alpha$ Cell fiber was then washed exhaustively with water (1L,  
478 10-15 times) until neutral. Finally,  $\alpha$ Cell was rinsed with acetone to accelerate drying, and then  
479 dried in a vacuum oven (>24 h) to <0.5% moisture content. This method yielded 55%  $\alpha$ Cell  
480 based on initial dry weight of wood.

481 Poly-3-hydroxybutyrate (PHB:  $M_w$  = 290,000 g/mol) and poly(3-hydroxybutyrate-co-3-  
482 hydroxyvalerate) (PHBV: 22 mol% HV content;  $M_w$  = 400,000 g/mol) powder obtained from  
483 Tianan Biopolymer Inc. (Ningbo, China). These PHAs are non-nucleated grades without any  
484 additives. Dicumyl peroxide (DCP: 98%) was a product of Sigma-Aldrich (USA).  $\text{CH}_2\text{Cl}_2$  (J.T.  
485 Baker, USA) was used as received.

486

### 487 **3.2. Biocomposites processing**

488 The PHB and PHBV based composites were prepared according to our previous work.<sup>26</sup>  
489 Briefly,  $\alpha$ Cell, PHB and PHBV were separately coated with DCP in acetone solution (4-8  
490 mg/mL) for 30 min, and then air dried followed by drying in a vacuum oven (>24 h) for prior to  
491 composites processing. DCP coated PHB or PHBV (80%) and  $\alpha$ Cell (20%; moisture content was  
492 < 0.5%) were dried and premixed in a beaker. The  $\alpha$ Cell-g-PHB and  $\alpha$ Cell-g-PHBV grafted  
493 biocomposites were prepared in a Dynisco Lab Mixer Molder/Extruder (LMM) using the  
494 reactive extrusion process and mixed (500 rpm) for time  $t_R$  and then extruded into strands (1 mm  
495  $\varnothing$ ) or injection molded into rectangular bars (60 x 9 x 2 mm<sup>3</sup>). Processing temperature was 175  
496 °C for PHB and 170 °C for PHBV based materials. The grafting efficiency (GE%) was evaluated  
497 by extracting the non-soluble copolymerized gel fraction using Soxhlet extraction for 24 h in  
498 chloroform to remove any nonreacted PHB. The extract was then filtered through a nylon screen

with pore size was about 450  $\mu\text{m}$  which was large enough to allow nonreacted cellulose fibers to pass through. The conditions (DCP concentration and reaction time  $t_R$ ) at which maximum grafted copolymer gel yield was considered to be optimized parameters used to prepare grafting modified biocomposites.<sup>19</sup> Simple blends of  $\alpha\text{Cell}$  and PHB ( $\alpha\text{Cell}$ -PHB) or PHBV ( $\alpha\text{Cell}$ -PHBV) without addition of DCP were prepared as control strand and rectangular bar samples.

### 3.3. Characterization

#### 3.3.1. $\alpha$ -Cellulose fiber analysis

Sieve analysis was performed on the isolated  $\alpha\text{Cell}$  fibers (10 g) using standard test sieves (40, 60, 80, 100, 200 mesh and pan) on a Soil Test Inc. Model CL-300B shaker for 10 min, and the weight distribution was determined. The average length and diameters of the isolated  $\alpha\text{Cell}$  fibers in each fraction were averaged from two hundred fibers dyed with safranin and observed by optical microscopy (Olympus BX51 in bright field mode and images captured using an Olympus DP70 digital camera).

The chemical composition of the original wood and  $\alpha\text{Cell}$  fibers for  $\text{CH}_2\text{Cl}_2$  extractive, lignin (acid soluble and Klason lignin), carbohydrate (hemicellulose and cellulose), and ash compositions were determined according to the methods described in details by Liang and McDonald.<sup>45</sup> More specifically, the wood and  $\alpha\text{Cell}$  fibers samples (4-5 g) were Soxhlet extracted with  $\text{CH}_2\text{Cl}_2$  (150 mL) for 16 h in accordance with ASTM D 1108-9623 and extractives were determined gravimetrically. Lignin content was determined as acid insoluble and acid soluble lignin on extractive free samples. Carbohydrate analysis was performed on the 2-stage acid-hydrolyzates according to ASTM E 1758-01.26 with slight modification. The dried sample (200 mg) was incubated in 72%  $\text{H}_2\text{SO}_4$  (2 mL) for 1 h at 30  $^\circ\text{C}$ , then diluted into 4%

522 H<sub>2</sub>SO<sub>4</sub>, and subjected to secondary hydrolysis in an autoclave (117 KPa and 121 °C) for 30 min.  
523 The hydrolyzate was filtered through a sintered crucible to obtain acid insoluble (Klason lignin)  
524 residue content gravimetrically after oven dried at 104 °C. An aliquot of the hydrolysate (made  
525 up to 250 mL) was taken to determine acid soluble lignin content at 205 nm using an absorption  
526 coefficient of 110 L/g/cm on a Beckman DU640 spectrometer. To the hydrolysate (5 mL)  
527 inositol (1 mL, 0.5 mg/mL) was added as an internal standard, then PbCO<sub>3</sub> (0.16 g) added to  
528 remove sulfate, and centrifuged. The supernatant was deionized by passing through an ion  
529 exchange resin cartridge (containing Amberlite IR-120 H<sup>+</sup> (0.5 mL) and Amberlite IRA35 OH<sup>-</sup>  
530 (0.5 mL)) and filtered through a 0.45 µm syringe filter (nylon, FisherScientific) into an HPLC  
531 vial. Monosaccharides were quantified by HPLC using two Rezex RPM columns in series (7.8  
532 mm × 30 cm, Phenomenex) at 85 °C equipped with a differential refractive index detector  
533 (Waters Associates model 2414) on elution with water (0.5 mL/min). The chromatographic data  
534 were analyzed using N2000 software (Science Technology Inc., China). The ash content of  
535 lodgepole pine wood and isolated αCell fibers were determined by furnacing samples at 600 °C  
536 according to ASTM D 1102-84.

537

### 538 3.3.2. Surface morphology of composites

539 Biocomposite bar samples were microtomed into 100 µm thick specimens and coated with  
540 carbon and gold. The prepared samples were investigated at 500x and 200x magnifications using  
541 a LEO Gemini field emission SEM operating at 4 kV under high vacuum.

542

### 543 3.3.3. Surface chemistry by FTIR spectroscopy

544 αCell fibers, PHB, PHBV, and biocomposites samples were characterized by FTIR



spectroscopy using a Thermo Nicolet iS5 FTIR spectrometer (ZnSe attenuated total reflection (ATR) probe (iD5)). Samples (in triplicate) were analyzed after vacuum drying. The absorbance spectra were baseline corrected and averaged using software Omnic v9.0 (Thermo Scientific).

Total crystallinity index (TCI) of  $\alpha$ Cell fibers, and the quantitative crystallinity indices of carbonyl (C=O stretching) group ( $I_{\text{C=O, PHB/PHBV}}$ ) and C-O stretching ( $I_{\text{C-O, PHB/PHBV}}$ ) of PHB/PHBV polymers before and after grafting were determined as follows:

$$\text{TCI} = A_{1370}/A_{2900} \quad (3)$$

$$I_{\text{C=O, PHB/PHBV}} = A_{1720}/A_{1740} \quad (4)$$

$$I_{\text{C-O, PHB/PHBV}} = A_{1230}/A_{1450} \quad (5)$$

where  $A_{1370}$  and  $A_{2900}$  are the areas of  $\alpha$ Cell peaks at 1370 and 2900  $\text{cm}^{-1}$ , respectively, and  $A_{1230}$ ,  $A_{1450}$ ,  $A_{1720}$  and  $A_{1740}$  are the areas of the peaks near to 1230, 1450, 1720 and 1740  $\text{cm}^{-1}$  from PHB (or PHBV) molecular chains, respectively. All band areas were obtained by peak fitting processing using IGOR Pro v6 (WaveMetrics) software.<sup>9</sup> Gaussian functionality was employed for peak fitting using selected peak width at half height (FWHM) values.

#### 3.3.4. Crystallinity characterized by WAXD

The crystalline structures of  $\alpha$ Cell fibers and injection molded neat PHB/PHBV and biocomposites samples were characterized by WAXD (Siemens D5000 diffractometer) at room temperature. The instrument was set up with a rotating Cu  $K\alpha_2$  X-ray tubes operating at 40 kV with a current density of 30 mA. Scanning was performed over the  $2\theta$  ranging from 5 to 50° with steps of 0.2°. The collected diffractograms were processed and peak of interest was fitted/deconvoluted (Gaussian function) using IGOR Pro v6 software. The intensity of each peak identified by peak fitting was mathematically computed. The methods to determine the

568 crystallinity index of  $\alpha$ Cell ( $CrI_{\alpha Cell}$ ), PHB ( $CrI_{PHB}$ ),<sup>26</sup> and PHBV ( $CrI_{PHBV}$ ) are according to:

569 
$$CrI_{\alpha Cell} = (1 - (I_{am}/I_{002})) \times 100 \quad (6)$$

570 where  $I_{am}$  is the intensity of the peak at  $2\theta = 18^\circ$  and  $I_{002}$  is the maximum intensity of the (002)  
571 plane diffraction.

572 The PHB and PHBV crystallinity index was calculated according to:

573 
$$CrI_{PHB} = I_{17}/I_{total-PHB} \times 100 \quad (7)$$

574 
$$CrI_{PHBV} = I_{17}/I_{total-PHBV} \times 100 \quad (8)$$

575 where  $I_{17}$  is the intensity of the peak close to  $2\theta = 17^\circ$  and  $I_{total}$  is the total intensity of all  
576 crystalline peaks of PHB ( $I_{total-PHB}$ ) or PHBV ( $I_{total-PHBV}$ ).

577 The crystal size dimension  $D_{hkl}$  was estimated as well by Scherrer's formula:<sup>46</sup>

578 
$$D_{hkl} = K \times \lambda / (\beta_{1/2} \times \cos\theta) \quad (9)$$

579 where  $K$  is the crystal shape constant,  $\lambda$  is the X-ray wavelength ( $\lambda = 0.1542$  nm,  $\beta_{1/2}$  is the  
580 FWHM,  $\approx 2$  Deg.) obtained by IGOR Pro, when peak fitting was conducted with Gaussian  
581 function, and  $\theta$  is the diffraction angle.

582

### 583 3.3.5. Tensile testing

584 All injection molded microtensile (dog-bone) samples (10 replicates) were conditioned at  
585 65% relative humidity at 23 °C for at least 7 d. Tensile tests were performed according to ASTM  
586 Standard D1708 using an Instron 5500R-1132 universal test machine with a constant strain rate  
587 of 1 mm/min, 5 kN load cell, and strain measured using an extensometer (model 3542, Epsilon  
588 Technology Corp.). The density of injection molded samples was calculated based on the initial  
589 conditioned dry weight and dimensions.

590

### 591 3.3.6. Thermal analysis

592 TGA was performed on a TGA-7 (Perkin-Elmer) instrument. Samples (3-5 mg, in  
593 duplicates) were heated from 50 to 900 °C at a rate of 20 °C/min under nitrogen (30 mL/min).  
594 Data were analyzed with replicated curves were averaged using Pyris v8 software (Perkin  
595 Elmer).

596 DSC measurement was performed on neat PHB/PHBV and biocomposites (4-6 mg, in  
597 duplicate) using a TA Instruments model Q200 DSC with refrigerated cooling. The samples were  
598 (i) equilibrated at 40 °C (3 min) then ramped to 190 °C at 10 °C/min, held isothermally for 5 min  
599 to remove any thermal history, (ii) cooled to -50 °C at the rate of -10 °C/min and held  
600 isothermally for 3 min, and (iii) reheated to 190 °C at 10 °C/min to record the heating scan. Data  
601 were analyzed using TA Universal Analysis v4.4A software. Glass transition ( $T_g$ ) and melting  
602 temperatures ( $T_m$ ) were determined from the peaks second heating scan, while crystallization  
603 transition temperature ( $T_c$ ) was obtained from the peak of cooling scan. The degree of  
604 crystallinity ( $X_c$  %) of PHB and PHBV was calculated as follows:

$$605 \quad X_c \% = \Delta H_m / (\Delta H_0 \times W_f) \times 100 \quad (10)$$

606 where  $\Delta H_m$  is the melting enthalpy of sample (PHB and PHBV polymers), and  $\Delta H_0$  is melting  
607 enthalpy in J/g of 100% crystalline PHB (146 J/g),<sup>37, 47</sup> and  $W_f$  is the weight fraction of PHB or  
608 PHBV (80%) in biocomposites samples. Note: if the differences of transition temperatures  
609 between duplicates were less than 0.2 °C, standard deviation will not be reported.

610

611 DMA measurements were conducted on biocomposite samples using a TA Q800  
612 Instruments. At least duplicate rectangular injection molded rectangular bars (60 x 9 x 2 mm<sup>3</sup>)  
613 were tested using a 3-point bending fixture (50 mm span). Samples were heated from 30 to 150

614 °C at 2 °C/min, 0.05% strain, and at a single frequency of 1 Hz. Data was analyzed by TA  
615 Universal Analysis v4.4A software.

616 The  $\alpha$ Cell/PHB and  $\alpha$ Cell/PHBV interfacial adhesion was evaluated by an adhesion factor  
617 ( $A$ ) which was calculated from DMA results at 30 °C as follows:<sup>9, 48</sup>

$$618 \quad A = (1/(1-V_f)) (\tan \delta_c / \tan \delta_m) - 1 \quad (11)$$

619 where, c and m subscripts represent biocomposites and polymer matrix (PHB and PHBV), and  $V_f$   
620 is the fiber volume fraction which was determined in accordance to ASTM standard D2584:

$$621 \quad V_f = (W_f \rho_m) / (W_f \rho_m + W_m \rho_f) \quad (12)$$

622 where  $W_f$  is weight of  $\alpha$ Cell fibers which is 20%,  $W_m$  is the weight of polymer matrix which is  
623 80%,  $\rho_f$  is the density of fibers ( $\rho_f = 1.5 \text{ g/cm}^3$ ),<sup>49</sup> and  $\rho_m$  is the density of matrix ( $\rho_m$  values of  
624 PHB and PHBV are 1.18 and 1.10 g/cm<sup>3</sup>, respectively).  $V_f$  values of PHB and PHBV based  
625 composites were 16% and 15%, respectively.

626

#### 627 3.3.7. Rheological analysis

628 The dynamic rheological measurements ( $G'$ ,  $G''$  and  $\eta^*$ ) were determined using a Bohlin  
629 CVO 100 rheometer, parallel plate (25 mm Ø), in oscillating shear mode with an ETC module on  
630 molded discs (2 mm x 25 mm Ø) samples. Experiments were performed in the linear viscoelastic  
631 region. For PHB and PHBV based materials, measurements were carried out at 175 and 170 °C,  
632 respectively, in the frequency range of 0.1 to 100 rad/s at an applied iso-strain of 0.5%. Data was  
633 analyzed using the Bohlin rheology v6.51 software.

634

## 635 4. Conclusion

636 The use of DCP in grafting modification of  $\alpha$ Cell/PHB and  $\alpha$ Cell/PHBV biocomposites via

637 *in-situ* reactive extrusion process was successful to achieve beneficial properties. Surface  
638 morphology by SEM revealed better compatibility of cellulose in the polymer (PHB and PHBV)  
639 matrix of the resultant biocomposites due to grafting modification as compared to blends. The  
640 tensile tests showed the grafting increased the toughness and flexibility of biocomposites due to  
641 the enhanced fiber-polymer matrix interaction and lower degree of crystallinity as compared to  
642 neat polymers and simple blends. The degree of crystallinity of the composites was reduced  
643 through grafting, which was reflected by the crystallinity indices estimated from quantitative  
644 FTIR and WAXD analyses. Grafting was found to have a significant influence on the thermal  
645 properties (e.g. stability) of  $\alpha$ Cell-g-PHB/PHBV biocomposites. Lower processing temperatures  
646 and shorter cycle times during melt processing could be achieved and further minimize  
647 degradation. Grafting improved the interfacial bonding between  $\alpha$ Cell fibers and polymer matrix  
648 as determined by the adhesion factor. It can be concluded that this approach afforded cellulose  
649 reinforced bioplastic composite materials with significantly improved mechanical and thermal  
650 properties by chemically grafting the fibers with the matrix to improve stress transfer. This  
651 grafting modification was achieved via a one-step reactive extrusion process and can provide a  
652 sustainable strategy to utilize cellulose fibers derived from various renewable resources  
653 including any at-risk intermountain wood species to create value added products. This developed  
654 technique can be applied to PHB/PHBV biosynthesized from waste substrate by mixed microbial  
655 consortia to lower the cost of these materials which will help their applications as bulk materials.

## 656 **Acknowledgement**

657 The authors would like to acknowledge (i) the financial support from a USDA-Forest  
658 Products Laboratory Grant 08-JV-111111, (ii) USDA-CSREES Grant 2007-34158-17640 for  
659 supporting the DSC and DMA, and (iii) ThermoScientific for the FTIR spectrometer.

## 660 References

- 661 1. G.-Q. Chen and M. K. Patel, *Chem. Rev.*, 2012, **112**, 2082-2099.
- 662 2. R. U. Halden, *Annual Review of Public Health*, 2010, **31**, 179-194.
- 663 3. D. Garlotta, *J. Polym. Environ.*, 2001, **9**, 63-84.
- 664 4. T. Mekonnen, P. Mussone, H. Khalil and D. Bressler, *Journal of Materials Chemistry A*,  
665 2013, **1**, 13379.
- 666 5. J. Lunt, *Polym. Degrad. Stab.*, 1998, **59**, 145-152.
- 667 6. M. Yamaguchi and K. Arakawa, *Eur. Polym. J.*, 2006, **42**, 1479-1486.
- 668 7. R. M. Rasal, A. V. Janorkar and D. E. Hirt, *Prog. Polym. Sci.*, 2010, **35**, 338-356.
- 669 8. A. Youngblood, J. Zhu and C. T. Scott, presented in part at the National Silviculture  
670 Workshop, Boise, Idaho, 15–18 June, 2009.
- 671 9. L. Wei, A. G. McDonald, C. Freitag and J. J. Morrell, *Polym. Degrad. Stab.*, 2013, **98**,  
672 1348-1361.
- 673 10. K. Suzuki, A. Sato, H. Okumura, T. Hashimoto, A. N. Nakagaito and H. Yano, *Cellulose*,  
674 2013, **21**, 507-518.
- 675 11. C. Fonseca-Valero, A. Ochoa-Mendoza, J. Arranz-Andrés and C. González-Sánchez,  
676 *Composites Part A*, 2015, **69**, 94-104.
- 677 12. M. Pöllänen, M. Suvanto and T. T. Pakkanen, *Compos. Sci. Technol.*, 2013, **76**, 21-28.
- 678 13. A. K. Bledzki and J. Gassan, *Prog. Polym. Sci.*, 1999, **24**, 221-274.
- 679 14. M. Bengtsson, P. Gatenholm and K. Oksman, *Compos. Sci. Technol.*, 2005, **65**, 1468-  
680 1479.
- 681 15. L. C. Tomé, R. J. B. Pinto, E. Trovatti, C. S. R. Freire, A. J. D. Silvestre, C. P. Neto and  
682 A. Gandini, *Green Chem.*, 2011, **13**, 419.
- 683 16. A. Gandini, *Green Chem.*, 2011, **13**, 1061.
- 684 17. O. Faruk, A. K. Bledzki, H.-P. Fink and M. Sain, *Prog. Polym. Sci.*, 2012, **37**, 1552-  
685 1596.
- 686 18. M. John and S. Thomas, *Carbohydr. Polym.*, 2008, **71**, 343-364.
- 687 19. D. Roy, M. Semsarilar, J. T. Guthrie and S. Perrier, *Chem. Soc. Rev.*, 2009, **38**, 2046-  
688 2064.

- 689 20. L. Yu, K. Dean and L. Li, *Prog. Polym. Sci.*, 2006, **31**, 576-602.
- 690 21. S. A. Madbouly, J. A. Schrader, G. Srinivasan, K. Liu, K. G. McCabe, D. Grewell, W. R.  
691 Graves and M. R. Kessler, *Green Chem.*, 2014, **16**, 1911.
- 692 22. L. Wei, S. Liang and A. G. McDonald, *Ind. Crop. Prod.*, 2015, **69**, 91–103.
- 693 23. D. Roy, M. Semsarilar, J. T. Guthrie and S. Perrier, *Chem. Soc. Rev.*, 2009, **38**, 2046-  
694 2064.
- 695 24. A. Carlmark, E. Larsson and E. Malmström, *Eur. Polym. J.*, 2012, **48**, 1646-1659.
- 696 25. N. Le Moigne, M. Longerey, J.-M. Taulemesse, J.-C. Bénézet and A. Bergeret, *Ind.*  
697 *Crop. Prod.*, 2014, **52**, 481-494.
- 698 26. L. Wei, A. G. McDonald and N. M. Stark, *Biomacromolecules*, 2015, **16**, 1040–1049.
- 699 27. T. A. Clark, K. L. Mackie, P. H. Dare and A. G. McDonald, *J. Wood Chem. Technol.*,  
700 1989, **9**, 135-166.
- 701 28. J. Yang, J.-J. Zhao, F. Xu and R.-C. Sun, *ACS Appl. Mater. Interfaces*, 2013, **5**, 12960-  
702 12967.
- 703 29. K. Joseph and S. Thomas, *Polymer*, 1996, **37**, 5139-5149.
- 704 30. W. J. Orts, R. H. Marchessault, T. L. Bluhm and G. K. Hamer, *Macromolecules*, 1990,  
705 **23**, 5368-5370.
- 706 31. K. Sudesh, H. Abe and Y. Doi, *Prog. Polym. Sci.*, 2000, **25**, 1503-1555.
- 707 32. L. Wei, N. M. Guho, E. R. Coats and A. G. McDonald, *J. Appl. Polym. Sci.*, 2014, **131**,  
708 **40333**, doi: 10.1002/app.40333.
- 709 33. D. Maldas and B. V. Kokta, *J. Adhes. Sci. Technol.*, 1994, **8**, 1439-1451.
- 710 34. N. M. Barkoula, S. K. Garkhail and T. Peijs, *Ind. Crop. Prod.*, 2010, **31**, 34-42.
- 711 35. M. Avella, G. La Rota, E. Martuscelli and M. Raimo, *J. Mater. Sci.*, 2000, **35**, 829-836.
- 712 36. S. Modi, K. Koelling and Y. Vodovotz, *Eur. Polym. J.*, 2011, **47**, 179-186.
- 713 37. L. Wei and A. G. McDonald, *J. Appl. Polym. Sci.*, 2015, **132**, Doi: 10.1002/app.41724.
- 714 38. R. Bhardwaj, A. K. Mohanty, L. T. Drzal, F. Pourboghraat and M. Misra,  
715 *Biomacromolecules*, 2006, **7**, 2044-2051.
- 716 39. M. Scandola, M. L. Focarete, G. Adamus, W. Sikorska, I. Baranowska, S. Swierczek, M.  
717 Gnatowski, M. Kowalczyk and Z. Jedlinski, *Macromolecules*, 1997, **30**, 2568-2574.

- 718 40. J. O. Zoppe, M. S. Peresin, Y. Habibi, R. A. Venditti and O. J. Rojas, *ACS Appl. Mater.*  
719 *Interfaces*, 2009, **1**, 1996-2004.
- 720 41. E. Ten, D. F. Bahr, B. Li, L. Jiang and M. P. Wolcott, *Ind. Eng. Chem. Res.*, 2012, **51**,  
721 2941-2951.
- 722 42. D. Yan, W.-J. Wang and S. Zhu, *Polymer*, 1999, **40**, 1737-1744.
- 723 43. D. H. S. Ramkumar and M. Bhattacharya, *Polym. Eng. Sci.*, 1998, **38**, 1426-1435.
- 724 44. J. S. Fabiyi, A. G. McDonald, M. P. Wolcott and P. R. Griffiths, *Polym. Degrad. Stab.*,  
725 2008, **93**, 1405-1414.
- 726 45. S. Liang and A. G. McDonald, *J. Agric. Food Chem.*, 2014, 140805102128006.
- 727 46. L. E. Alexander, *X-ray diffraction method in polymer science*, Wiley-Interscience, New  
728 York, 1969.
- 729 47. P. J. Barham, A. Keller and E. L. Otun, *J. Mater. Sci.*, 1984, **19**, 2781-2794.
- 730 48. J. Kubát, M. Rigdahl and M. Welandar, *J. Appl. Polym. Sci.*, 1990, **39**, 1527-1539.
- 731 49. W. A. Sisson, in *Cellulose and cellulose derivatives*, ed. E. Ott, Interscience, New York.,  
732 1943, ch. 4, pp. 214, vol. 5, ch. 3.
- 733
- 734
- 735



736 **Table 1** Chemical composition of the lodgepole pine wood and isolated  $\alpha$ Cell fibers (dry basis).

| Composition                                 | Lodgepole pine wood (%) | $\alpha$ -Cellulose (%) |
|---------------------------------------------|-------------------------|-------------------------|
| Cellulose                                   | 39.1                    | 95.9                    |
| Glucan 6C                                   | 39.1                    | 95.9                    |
| Hemicellulose                               | 33.1                    | 3.9                     |
| Xylan 5C                                    | 5.3                     | 3.8                     |
| Galactan 6C                                 | 11.5                    | 0.0                     |
| Mannan 6C                                   | 16.3                    | 0.1                     |
| Arabinan 5C                                 | 1.5                     | 0.0                     |
| Lignin                                      | 26.9                    | 0.2                     |
| Klason lignin                               | 26.5                    | 0.2                     |
| Acid soluble lignin (ASL)                   | 0.4                     | 0.0                     |
| CH <sub>2</sub> Cl <sub>2</sub> extractives | 1.7                     | 0.0                     |
| Ash                                         | 0.01                    | 0.0                     |

737

**Table 2** Yield of each fraction of  $\alpha$ Cell fibers retained on sieves with various openings, and the averaged fiber length, diameter, and the aspect ratio measured by microscopic analysis.

| Retained on<br>mesh | Sieve<br>opening ( $\mu\text{m}$ ) | Particle weight<br>fraction (%) | Fiber length<br>(L, mm) <sup>b</sup> | Fiber diameter<br>(d, $\mu\text{m}$ ) <sup>a</sup> | Aspect ratio<br>(L/d) |
|---------------------|------------------------------------|---------------------------------|--------------------------------------|----------------------------------------------------|-----------------------|
| 40                  | 420                                | 7.3                             | -                                    | -                                                  | -                     |
| 60                  | 250                                | 6.3                             | -                                    | -                                                  | -                     |
| 80                  | 177                                | 16.0                            | $0.8 \pm 0.1$                        | $19.0 \pm 1.6$                                     | 42.1                  |
| 100                 | 149                                | 11.4                            | $0.7 \pm 0.1$                        | $18.7 \pm 2.8$                                     | 37.4                  |
| 200                 | 70                                 | 37.5                            | $0.6 \pm 0.1$                        | $18.5 \pm 2.0$                                     | 32.4                  |
| < 200               | <70                                | 21.5                            | $0.4 \pm 0.1$                        | $14.0 \pm 2.1$                                     | 28.6                  |
| Average             |                                    |                                 | 0.5                                  | 15.1                                               | 29.3                  |

<sup>a</sup> The fiber length and diameter of  $\alpha$ Cell fibers of the 60 and 40 mesh fractions could not be accurately determined due to fiber bundles as shown in Fig. 2a and 2b.

743 **Table 3** Crystallinity parameters characterized by FTIR and WAXD. <sup>a</sup>

| Sample               | FTIR                                   |                            |                            | WAXD                                    |                          |                |                |
|----------------------|----------------------------------------|----------------------------|----------------------------|-----------------------------------------|--------------------------|----------------|----------------|
|                      | TCI <sub><math>\alpha</math>Cell</sub> | I <sub>C=O, PHB/PHBV</sub> | I <sub>C-O, PHB/PHBV</sub> | CrI% <sub><math>\alpha</math>Cell</sub> | CrI% <sub>PHB/PHBV</sub> | D (002)<br>(Å) | D (020)<br>(Å) |
| $\alpha$ Cell        | 0.4                                    | -                          | -                          | 59.1                                    | -                        | 250            | -              |
| PHB                  | -                                      | 3.8                        | 2.0                        | -                                       | 61.0                     | -              | 1274           |
| $\alpha$ Cell-PHB    | 0.3                                    | 3.3                        | 0.6                        | 56.4                                    | 57.9                     | 233            | 1108           |
| $\alpha$ Cell-g-PHB  | 0.1                                    | 2.2                        | 0.4                        | 33.9                                    | 45.4                     | 90             | 312            |
| PHBV                 | -                                      | 2.7                        | 0.8                        | -                                       | 36.2                     | 90             | 190            |
| $\alpha$ Cell-PHBV   | 0.3                                    | 2.6                        | 0.4                        | 40.2                                    | 34.2                     | 82             | 153            |
| $\alpha$ Cell-g-PHBV | 0.1                                    | 1.8                        | 0.1                        | 28.7                                    | 26.4                     | 40             | 97             |

744 <sup>a</sup> Crystal sizes were determined in the direction perpendicular to the planes of (002) and (020) for

745  $\alpha$ Cell and polymers PHB and PHBV, respectively.

746 **Table 4** Density ( $\rho$ ), tensile strength ( $\sigma$ ), tensile (Young's) modulus ( $E$ ), elongation at break ( $\varepsilon$ ),  
747 and energy at break (EAB) of molded neat PHB/PHBV and their biocomposites samples (10  
748 replicates). Standard deviation values are given in parentheses. Samples with same letter are not  
749 significantly different at 95% confidence interval of probability using Tukey's paired t-tests.

| Sample               | $\rho$ (g/cm <sup>3</sup> ) | $E$ (GPa)               | $\sigma$ (MPa)           | $\varepsilon$ (%)        | EAB (J)                  |
|----------------------|-----------------------------|-------------------------|--------------------------|--------------------------|--------------------------|
| Neat PHB             | 1.18 (0.02) <sup>abc</sup>  | 2.2 (0.3) <sup>a</sup>  | 23.1 (3.3) <sup>a</sup>  | 13.6 (1.0) <sup>a</sup>  | 0.33 (0.03) <sup>a</sup> |
| $\alpha$ Cell-PHB    | 1.14 (0.03) <sup>abc</sup>  | 2.6 (0.2) <sup>ab</sup> | 25.9 (1.4) <sup>ab</sup> | 11.2 (0.3) <sup>b</sup>  | 0.41 (0.03) <sup>b</sup> |
| $\alpha$ Cell-g-PHB  | 1.10 (0.02) <sup>abc</sup>  | 5.5 (0.7) <sup>c</sup>  | 28.1 (1.8) <sup>c</sup>  | 13.2 (2.0) <sup>ac</sup> | 0.60 (0.05) <sup>c</sup> |
| Neat PHBV            | 1.18 (0.01) <sup>def</sup>  | 0.9 (0.1) <sup>d</sup>  | 11.8 (2.0) <sup>d</sup>  | 19.6 (1.8) <sup>d</sup>  | 0.45 (0.03) <sup>d</sup> |
| $\alpha$ Cell-PHBV   | 1.10 (0.02) <sup>def</sup>  | 1.3 (0.1) <sup>e</sup>  | 13.9 (2.5) <sup>e</sup>  | 15.4 (1.8) <sup>e</sup>  | 0.53 (0.05) <sup>e</sup> |
| $\alpha$ Cell-g-PHBV | 1.06 (0.02) <sup>def</sup>  | 2.4 (0.3) <sup>f</sup>  | 15.9 (1.7) <sup>f</sup>  | 18.8 (1.0) <sup>df</sup> | 0.76 (0.05) <sup>f</sup> |

750

751

**Table 5** Thermal degradation temperatures of PHB and PHBV based biocomposites obtained from TGA data. <sup>a</sup>

| Samples              | T <sub>onset</sub> (°C) | T <sub>max</sub> (°C)      |                                           | T <sub>comp</sub> (°C) |
|----------------------|-------------------------|----------------------------|-------------------------------------------|------------------------|
|                      |                         | T <sub>PHB/PHBV</sub> (°C) | T <sub><math>\alpha</math>Cell</sub> (°C) |                        |
| $\alpha$ -Cellulose  | 303                     |                            | 342                                       | 400                    |
| PHB                  | 263                     | 285                        |                                           | 303                    |
| $\alpha$ Cell-PHB    | 264                     | 287                        | 328                                       | 358                    |
| $\alpha$ Cell-g-PHB  | 277                     | 298                        | 335                                       | 364                    |
| PHBV                 | 250                     | 270                        |                                           | 292                    |
| $\alpha$ Cell-PHBV   | 253                     | 273                        | 334                                       | 362                    |
| $\alpha$ Cell-g-PHBV | 260                     | 284                        | 340                                       | 363                    |

<sup>a</sup> T<sub>onset</sub> = beginning weight loss; T<sub>max</sub> = the temperature of maximum decomposition rate; T<sub>PHB</sub>, T<sub>PHBV</sub> = maximum decomposition rate of PHB and PHBV degradation stage (the 1<sup>st</sup> stage of biocomposites), respectively; T <sub>$\alpha$ Cell</sub> = maximum decomposition rate of  $\alpha$ Cell degradation (the 2<sup>nd</sup> stage of biocomposites); T<sub>comp</sub> = 100% mass loss onset point.

759 **Table 6** Crystallization temperature ( $T_c$ ), peak temperatures of the low- and high-temperature  
760 endotherms ( $T_{m1}$  and  $T_{m2}$ ), and degree of crystallinity ( $X_c$  %). Standard deviation values are  
761 given in parentheses.

| Samples              | $T_g$ (°C) | $T_{m1}$ (°C) | $T_{m2}$ (°C) | $X_c$ (%)  | $T_c$ (°C) | $T_c$ (°C) | $\Delta H_c$<br>(J/g) |
|----------------------|------------|---------------|---------------|------------|------------|------------|-----------------------|
| Neat PHB             | 4.9        | 159           | 169           | 53.4 (1.2) | 85         | ND         | 67                    |
| $\alpha$ Cell-PHB    | 5.3        | 161           | 171           | 50.0 (0.5) | 121        | ND         | 63                    |
| $\alpha$ Cell-g-PHB  | 6.9        | 155           | 164           | 43.0 (2.3) | 103        | ND         | 55                    |
| Neat PHBV            | -4.0       | 129           | 153           | 17.8 (0.5) | 67         | ND         | 27                    |
| $\alpha$ Cell-PHBV   | -2.0       | 126           | 151           | 16.8 (1.1) | 39         | 56.4       | 22                    |
| $\alpha$ Cell-g-PHBV | -0.5       | 118           | 135           | 4.60 (0.2) | ND         | 76.5       | ND                    |

762 ND: not detected.

763

**Table 7** Comparative storage moduli ( $E'$ ) at selected temperatures,  $\tan\delta$  and adhesion factor ( $A$ ) near to room temperature (30 °C) of neat PHB and PHBV based samples. Standard deviation values are given in parentheses.

| Samples              | Storage modulus $E'$ (MPa) |       |       | $\tan\delta$                    |                                 |                                 | $V_f(\%)$ | $A_{30^\circ\text{C}}$ |
|----------------------|----------------------------|-------|-------|---------------------------------|---------------------------------|---------------------------------|-----------|------------------------|
|                      | 30 °C                      | 50 °C | 70 °C | $\tan\delta_{30^\circ\text{C}}$ | $\tan\delta_{50^\circ\text{C}}$ | $\tan\delta_{70^\circ\text{C}}$ |           |                        |
| Neat PHB             | 1797                       | 1466  | 1276  | 0.076                           | 0.037                           | 0.040                           | 0         | -                      |
| $\alpha$ Cell-PHB    | 2395                       | 2073  | 1820  | 0.070                           | 0.043                           | 0.050                           | 16 (0.5)  | 1.25 (0.20)            |
| $\alpha$ Cell-g-PHB  | 2869                       | 2255  | 1934  | 0.040                           | 0.035                           | 0.054                           | 15 (1.2)  | 0.28 (0.00)            |
| Neat PHBV            | 630                        | 548   | 439   | 0.090                           | 0.065                           | 0.074                           | 0         | -                      |
| $\alpha$ Cell-PHBV   | 1182                       | 742   | 486   | 0.065                           | 0.068                           | 0.090                           | 16 (0.5)  | 0.72 (0.14)            |
| $\alpha$ Cell-g-PHBV | 1432                       | 985   | 706   | 0.050                           | 0.080                           | 0.104                           | 15 (1.2)  | 0.32 (0.02)            |

Note: the differences of moduli and  $\tan\delta$  between duplicates were less than 20 MPa and 0.005, respectively; hence standard deviation was not reported.

769

770 **Fig. 1.** Generalized schematic representation of grafted PHB or PHBV polymers onto  $\alpha$ Cell (a),  
771 and the chemical structures of grafted  $\alpha$ Cell-g-PHB (b) and  $\alpha$ Cell-g-PHBV (c) biocomposites.

772



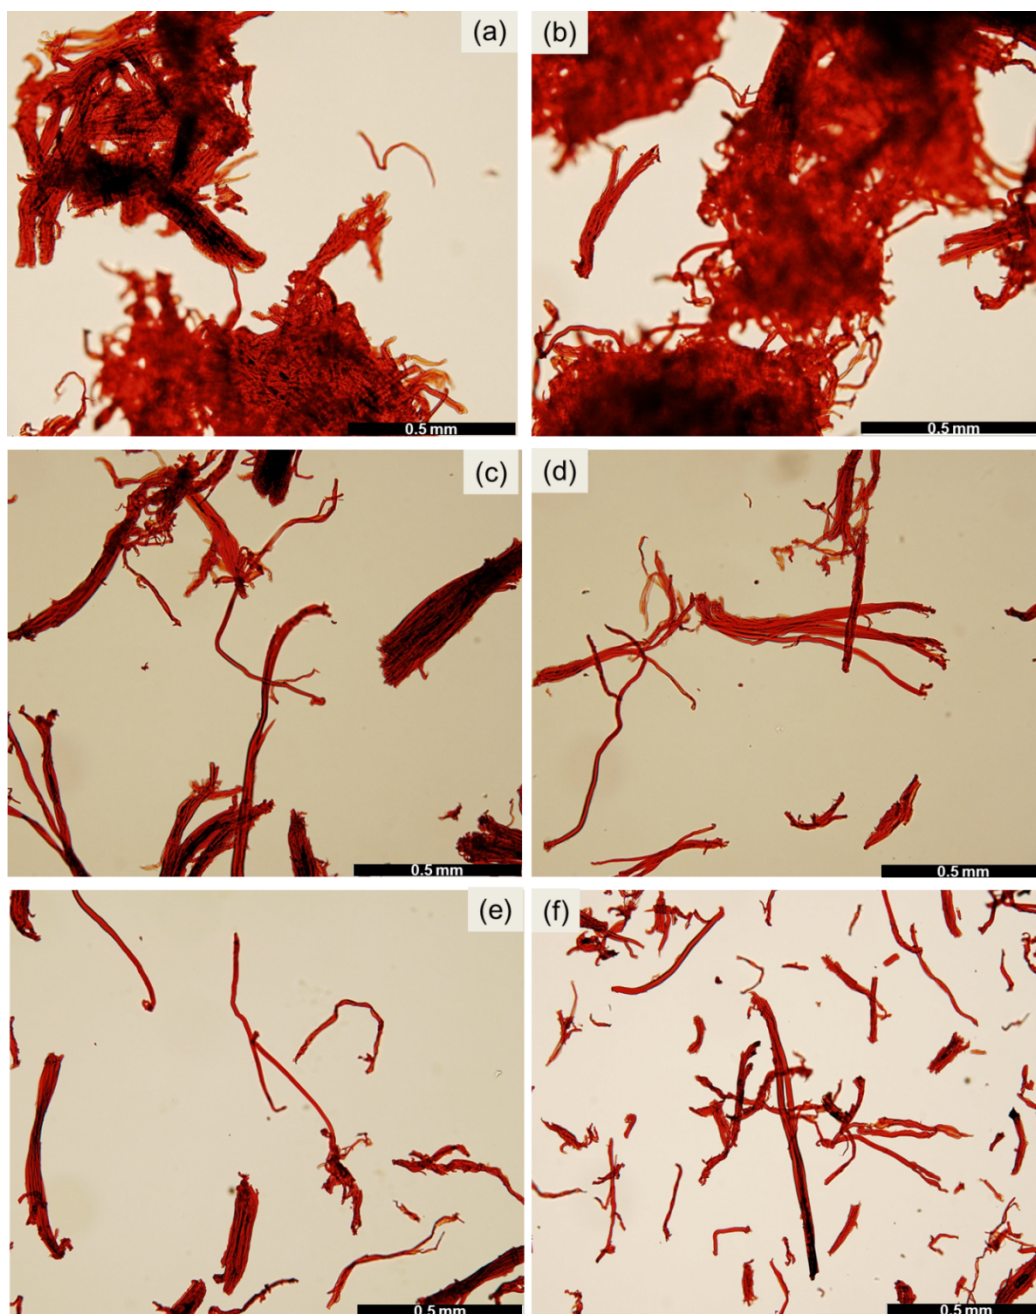

773

774 **Fig. 2** Optical micrographs of  $\alpha$ Cell fibers fractions classified (a) >40 mesh, (b) >60 mesh, (c)

775 >80 mesh, (d) >100 mesh, (e) >200 mesh and (d) <200 mesh.

776

777

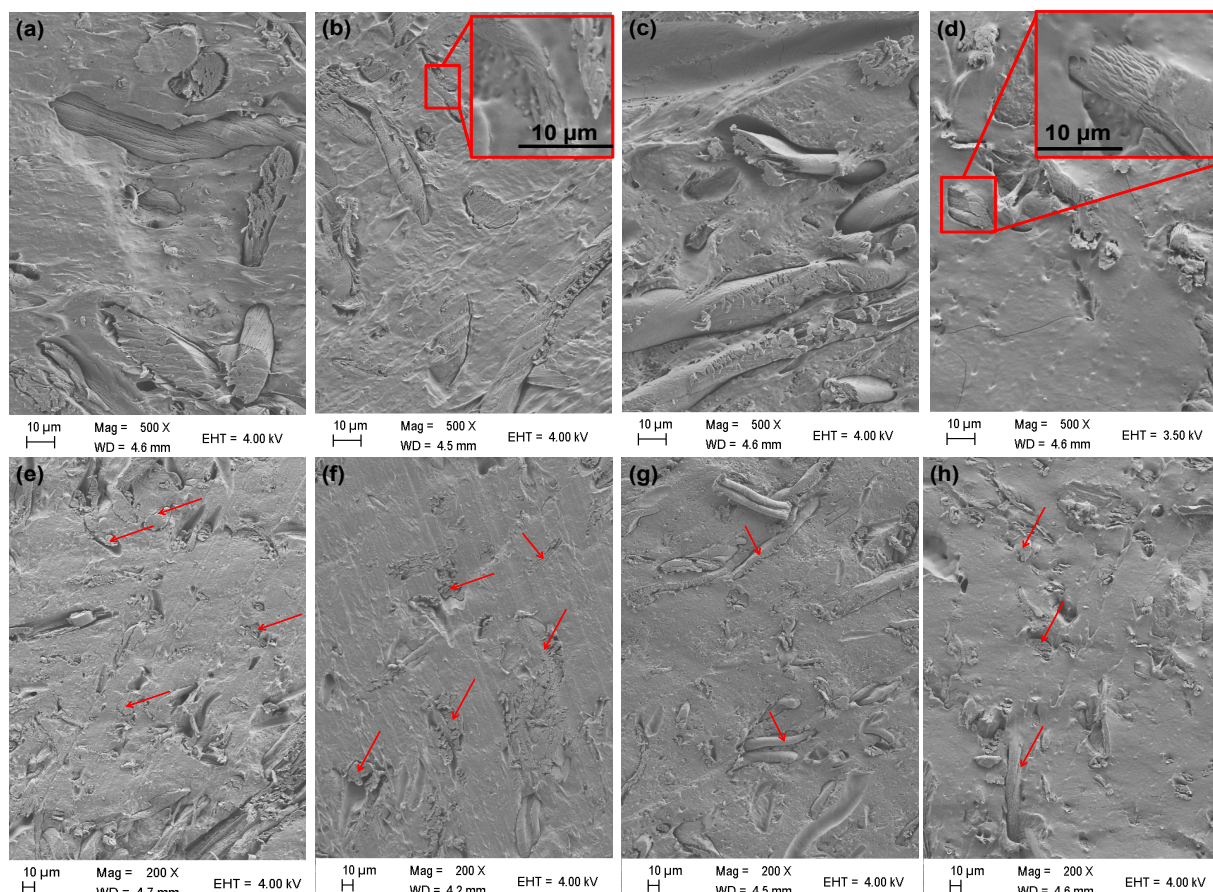

778

779 **Fig. 3** SEM micrographs of surface morphologies of  $\alpha$ Cell-PHB (a: 500x; e: 200x),  $\alpha$ Cell-g-PHB

780 (b: 500x; f: 200x),  $\alpha$ Cell-PHBV (c: 500x; g: 200x), and  $\alpha$ Cell-g-PHBV (d: 500x; h: 200x)

781 composites. Note: fiber and polymer matrix interface was shown in in-set micrographs with

782 larger magnification (1000x) of the grafted composites (b and d); fibers are pointed out by

783 arrows.

784

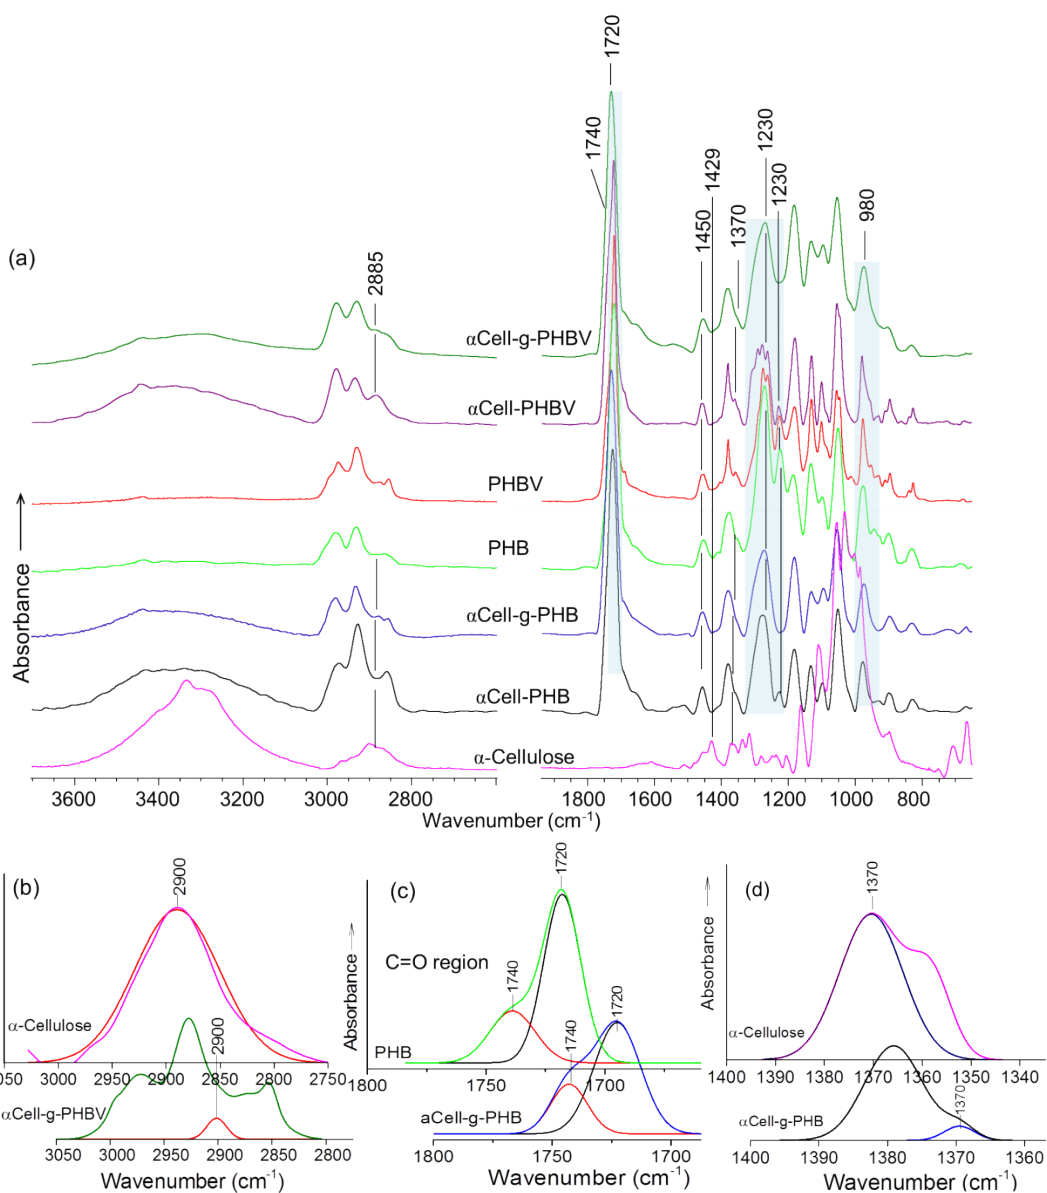

785

786 **Fig. 4** (a) FTIR spectra for  $\alpha$ -cellulose, PHB, PHBV, and their composites samples; (b)  $-C-H$   
 787 stretching ( $2900\text{ cm}^{-1}$ ) fitted bands for  $\alpha$ Cell and  $\alpha$ Cell-g-PHBV composites; (c) carbonyl ( $C=O$ )  
 788 fitted peaks for PHB and  $\alpha$ Cell-g-PHB composite, and (d)  $-C-H$  bending ( $1370\text{ cm}^{-1}$ ) fitted  
 789 peaks for  $\alpha$ Cell and  $\alpha$ Cell-g-PHB composite.

790

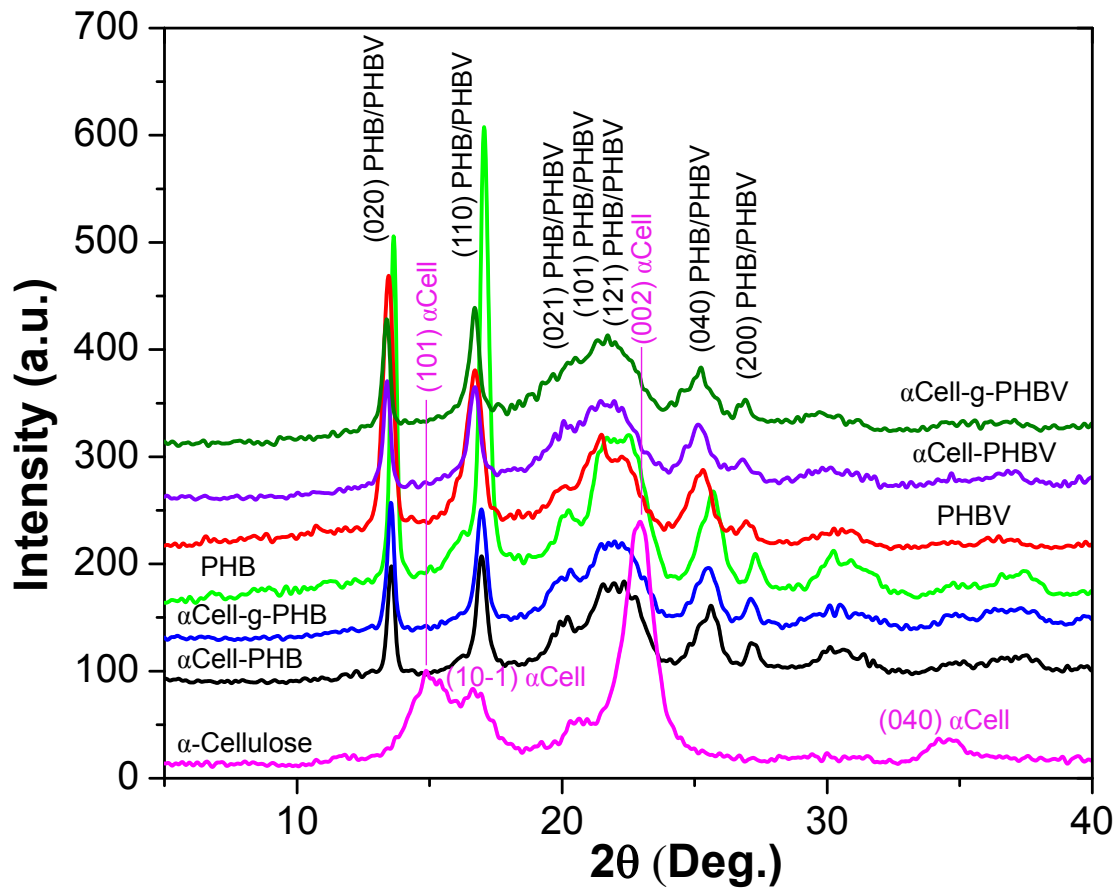

791

792 **Fig. 5** XRD diffractograms of  $\alpha$ Cell, PHB, PHBV, blended composite ( $\alpha$ Cell-PHB and  $\alpha$ Cell-  
 793 PHBV) and grafted composite ( $\alpha$ Cell-g-PHB and  $\alpha$ Cell-g-PHBV) samples.

794

795

796 **Fig. 6** DSC cooling and the 2<sup>nd</sup> heating curves of (a) PHB,  $\alpha$ Cell-PHB and  $\alpha$ Cell-*g*-PHB and (b)

797 PHBV,  $\alpha$ Cell-PHBV and  $\alpha$ Cell-*g*-PHBV samples.



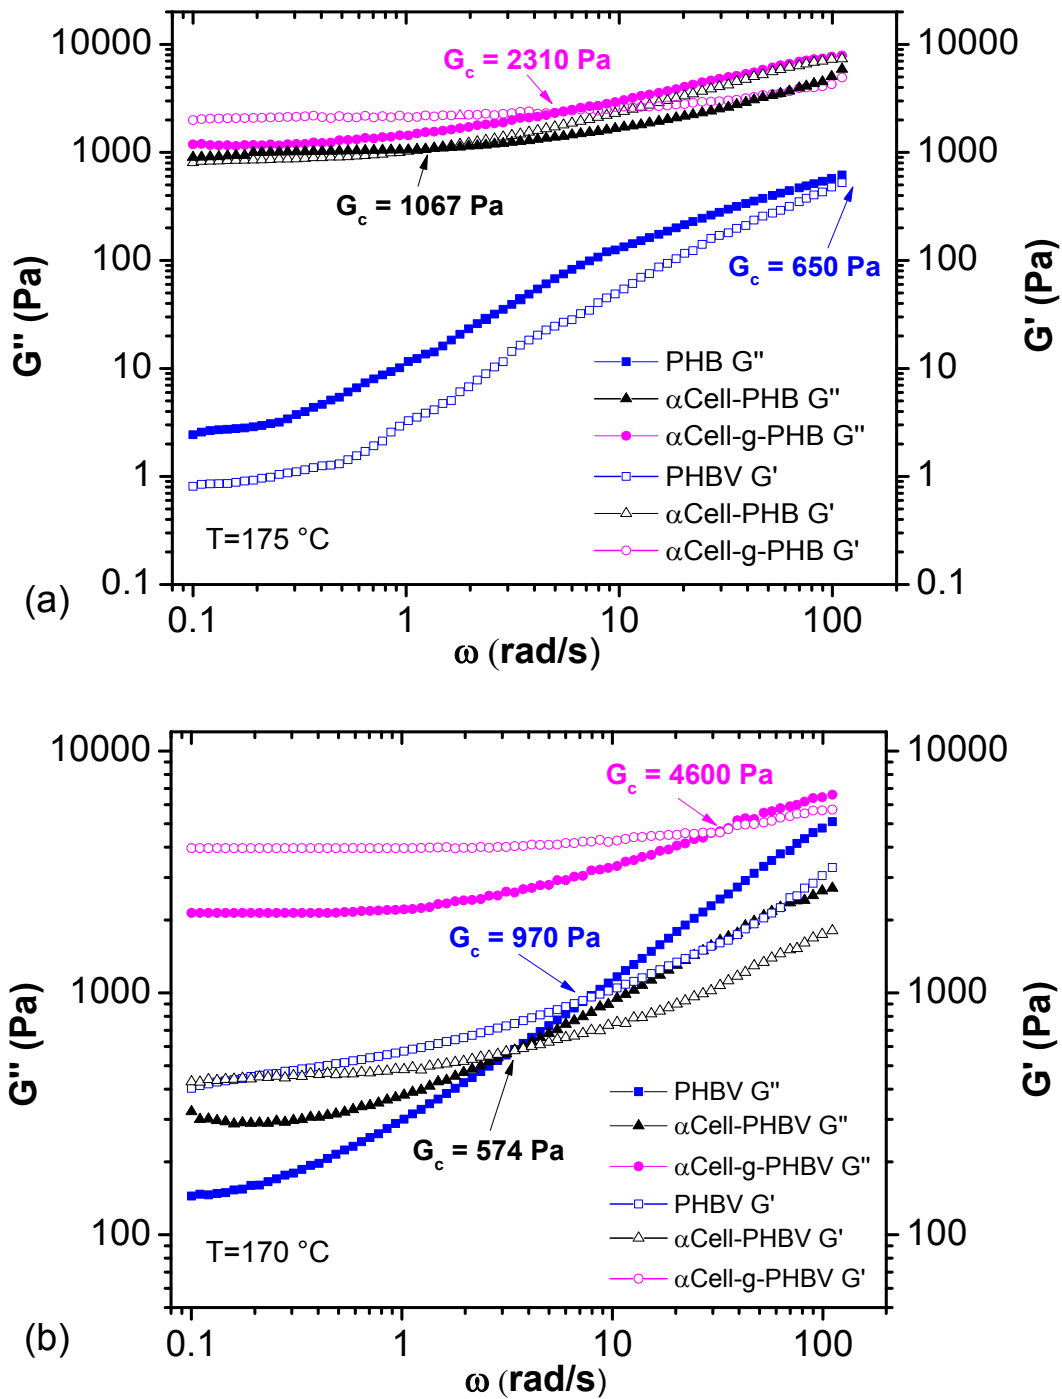

798

799 **Fig. 7** Effect of grafting on dynamic rheology storage ( $G'$ ) and loss ( $G''$ ) moduli of (a) PHB,

800  $\alpha$ Cell-PHB, and  $\alpha$ Cell-g-PHB samples at  $175^\circ\text{C}$  and (b) PHBV,  $\alpha$ Cell-PHBV and  $\alpha$ Cell-g-PHBV

801 samples at  $170^\circ\text{C}$ .  $G_c$  is the crossover modulus when  $G' = G''$ .

802
